# Supplementary material
Source: PubMed Central journal article supplement (PMC3837814)
Supplement: AEM.02411-13_zam999104949so1.pdf [file AEM.02411-13_zam999104949so1.pdf]

## SUPPLEMENTARY FIGURES AND TABLES

Bruno Contreras-Moreira and Pablo Vinuesa (2013).

GET\_HOMOLOGUES, a versatile software package for scalable and robust microbial pan-genome analysis.

The package, license and supplementary data can be downloaded at:

<http://www.eead.csic.es/compbio/soft/gethoms.php>

and

<http://maya.ccg.unam.mx/soft/gethoms.php>

### LICENSE AND USAGE TERMS

GET\_HOMOLOGUES is designed, created and maintained both at the Laboratory of Computational Biology at Estación Experimental de Aula Dei (EEAD/CSIC, <http://www.eead.csic.es/compbio>) in Zaragoza, Spain and at the Center for Genomic Sciences of Universidad Nacional Autónoma de Mexico (CCG/UNAM, <http://www.ccg.unam.mx/~vinuesa>).

The code has been written by Bruno Contreras-Moreira and Pablo Vinuesa and we kindly ask you to report errors or bugs in the program to the authors ( [bcontreras@eead.csic.es](mailto:bcontreras@eead.csic.es) / [vinuesa@ccg.unam.mx](mailto:vinuesa@ccg.unam.mx) ) and to acknowledge the use of the program in scientific publications:

Contreras-Moreira,B. and Vinuesa,P. (2013) GET\_HOMOLOGUES, a versatile software package for scalable and robust microbial pangenome analysis (2013). Appl. Environ. Microbiol. *In press*.

This software is copyright 2013, Bruno Contreras-Moreira and Pablo Vinuesa.

GET\_HOMOLOGUES is made freely available for academic research and shall not be used for any tasks related to military purposes. Commercial users interested in GET\_HOMOLOGUES should contact the authors.

This package includes BLAST, HMMER, COGtriangles, OrthoMCL, mcl, PHYLIP source code/executables, which are distributed with their own licenses. The user of GET\_HOMOLOGUES agrees to respect those as well.

This package is free software: you can redistribute it and/or modify it under the terms of the GNU General Public License as published by the Free Software Foundation, either version 3 of the License, or (at your option) any later version.

This program is distributed in the hope that it will be useful, but WITHOUT ANY WARRANTY; without even the implied warranty of MERCHANTABILITY or FITNESS FOR A PARTICULAR PURPOSE. See the GNU General Public License provided at the package download link for more details.

## **ACKNOWLEDGEMENTS**

We thank Romualdo Zayas and Víctor del Moral at CCG-UNAM for their technical support. We also thank Dr. David M. Kristensen and the development team of OrthoMCL for their permission to use their code in our project. Funding: Fundación ARAID, Consejo Superior de Investigaciones Científicas [grant number 200720I038]. DGAPA-PAPIIT UNAM-México [grant number IN212010], CONACyT-México [grant numbers P1-60071 and 179133].

**Figure S1.** Flowchart of the BDBH algorithm as implemented in *get\_homologues.pl* with default parameters and G genomes. First, inparalogues, defined as intra-specific bidirectional best hits (BDBHs), are identified in each genome; second, new genomes are incrementally compared to the reference genome and their BDBHs annotated; finally, clusters containing at least 1 sequence per genome are conserved. Note that the results of the BDBH clustering algorithm (as with COGtriangles and OMCL) can be fine-tuned by customizing diverse parameters, as detailed in the manual and summarized in Fig. 1 of the main text. This figure is taken from the manual.

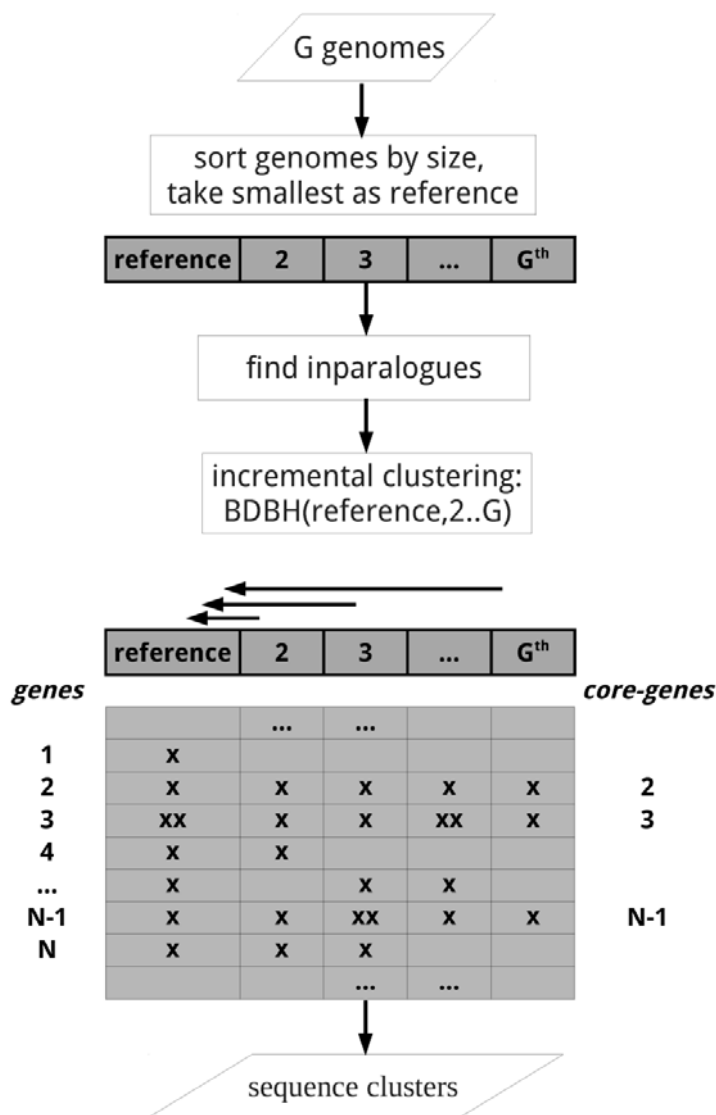

**Figure S2.** Definition: a cluster is called syntenic when it contains neighboring genes which are also contained in other single clusters. In this example gene X and gene Z are found to be syntenic, regardless of their orientation. This figure is taken from the manual.

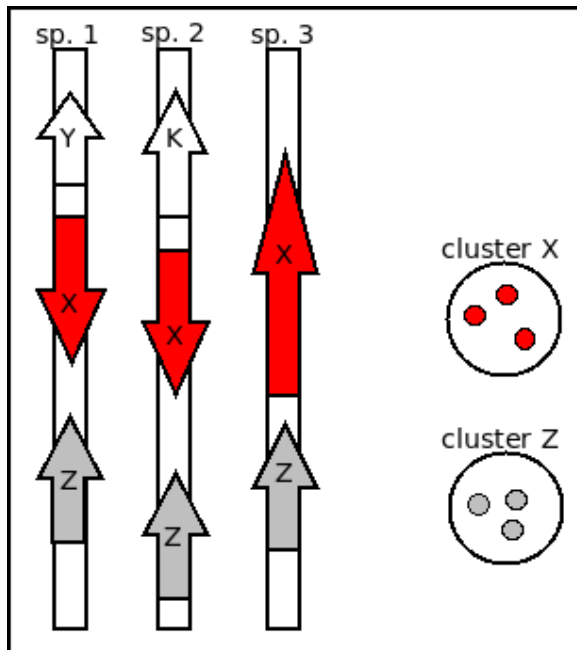

**Figure S3.** A) Overlap of soft-core clusters generated by OMCL and COGtriangles algorithms in GET\_HOMOLOGUES with 75% alignment coverage and 26 *Streptococcus* genomes (from 6 species) first analyzed by Lefébure & Stanhope. B) Venn analysis of the consensus soft-core genes produced by OMCL & COGtriangles and the core gene collection published by Lefébure & Stanhope, comprising 611 genes.

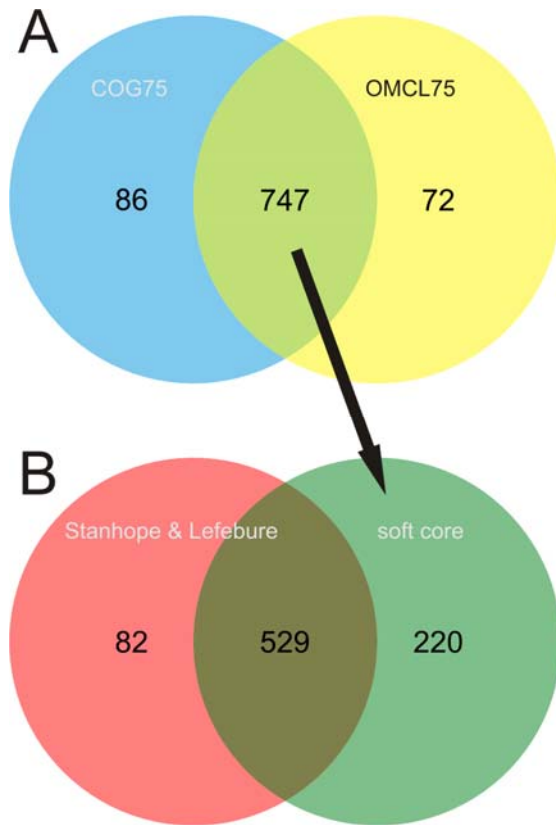

**Figure S4.** Maximum likelihood tree out of 364 concatenated alignments of single-copy consensus core genes of 50 *Streptococcus* species resulting from the intersection of those found by the BDBH, COGtriangles and OMCL algorithms, each run with the Pfam domain-scanning option turned on (-D).

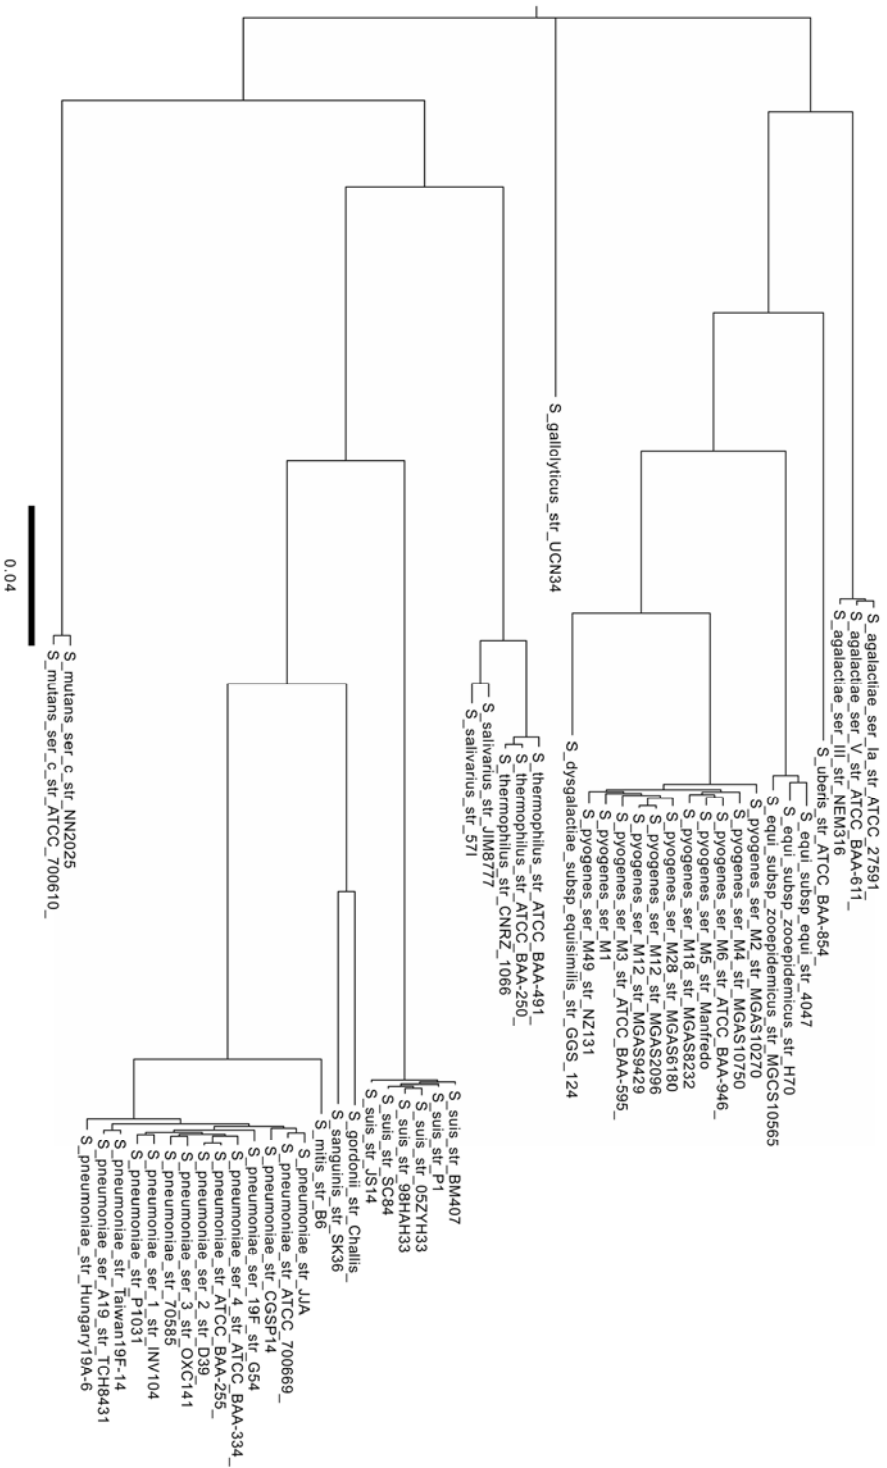

**Figure S5.** Runtime of a typical bacterial genomic BLASTP job as calculated with 1 to 8 CPU cores when splitting the task in batches of 100, 250 and 500 protein sequences. From these analyses, we suggest splitting BLAST (and Pfam HMMER searches, required with parameter `-D`) in batches of 100 sequences when *get\_homologues.pl* is run on a multi-core machine. This figure is taken from the manual.

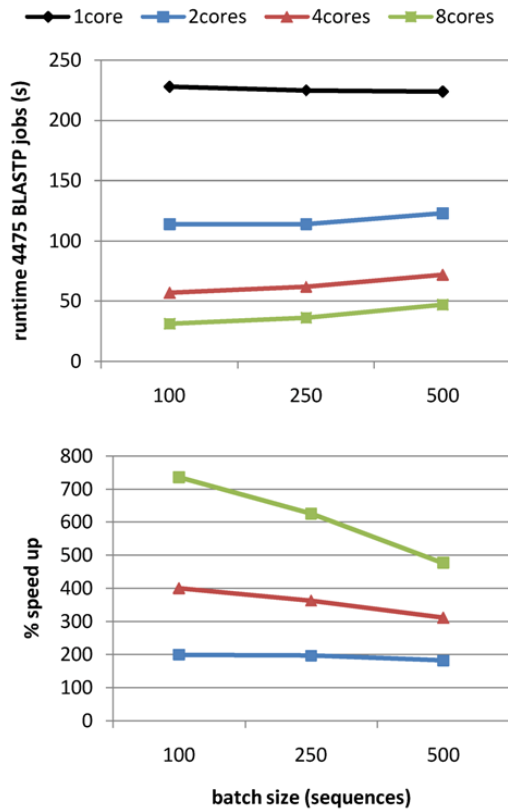

**Figure S6.** Computing time and RAM requirements of BDBH, COG and OMCL algorithms when processing increasing sets of microbial genomes. Performance is measured also when using the optional BerkeleyDB embedded database (-s parameter), which temporarily stores sequences in files. Broken lines correspond to jobs run with the -s parameter, revealing how computing time is sacrificed in trade of a significantly reduced RAM requirement. This figure is taken from the manual, where further details can be found.

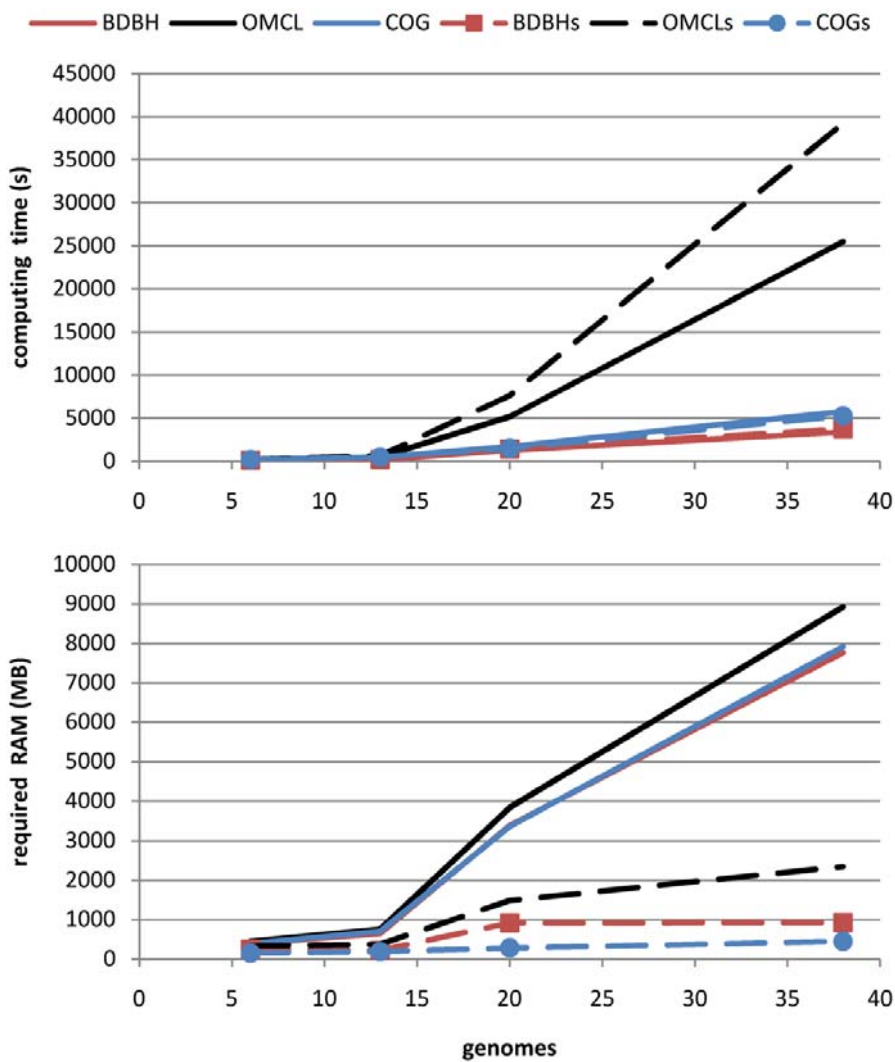



**Figure S7.** For  $G$  genomes, a typical *get\_homologues.pl* job requires running  $G^2$  BLAST searches in order to compare all against all sequences, including against itself to help infer inparalogues. Therefore, the resources required for calculating BLAST jobs grow quadratically. Instead, the BDBH algorithm with option *-b* requires only  $3G$  BLAST searches (in grey) for any reference genome. That is, each genome is blasted only against itself (to detect inparalogs) and against the selected reference genome. This figure is taken from the manual.

|                 | ref | 2 | 3 | 4 | 5 | 6 | ... | $G^{\text{th}}$ |
|-----------------|-----|---|---|---|---|---|-----|-----------------|
| reference       |     |   |   |   |   |   |     |                 |
| 2               |     |   |   |   |   |   |     |                 |
| 3               |     |   |   |   |   |   |     |                 |
| 4               |     |   |   |   |   |   |     |                 |
| 5               |     |   |   |   |   |   |     |                 |
| 6               |     |   |   |   |   |   |     |                 |
| ...             |     |   |   |   |   |   |     |                 |
| $G^{\text{th}}$ |     |   |   |   |   |   |     |                 |

**Table T1.** List of 50 *Streptococcus* proteomes downloaded from OMA browser (dec2012 version).

| Name  | TaxonID | Scientific name                                                                    | Genome source  | Version/Release                                   |
|-------|---------|------------------------------------------------------------------------------------|----------------|---------------------------------------------------|
| STRA1 | 205921  | <i>Streptococcus agalactiae</i> serotype Ia (strain ATCC 27591 / A909 / CDC SS700) | EBI            | 30-SEP-2005 (Rel. 85, Last updated, Version 1)    |
| STRA3 | 211110  | <i>Streptococcus agalactiae</i> serotype III (strain NEM316)                       | Genome Reviews | 02-MAR-2010 (Rel. 118, Last updated, Version 117) |
| STRA5 | 208435  | <i>Streptococcus agalactiae</i> serotype V (strain ATCC BAA-611 / 2603 V/R)        | NCBI           | NC_004116.1 GI:22536185                           |
| STRDG | 486410  | <i>Streptococcus dysgalactiae</i> subsp. equisimilis (strain GGS_124)              | Genome Reviews | 03-NOV-2009 (Rel. 113, Last updated, Version 3)   |
| STRE4 | 553482  | <i>Streptococcus equi</i> subsp. equi (strain 4047)                                | EBI            | 27-MAR-2009 (Rel. 100, Last updated, Version 2)   |
| STRE5 | 1046629 | <i>Streptococcus salivarius</i> (strain 57.I)                                      | EBI            | 22-SEP-2011 (Rel. 110, Last updated, Version 2)   |
| STRE8 | 347253  | <i>Streptococcus salivarius</i> (strain JIM8777)                                   | EBI            | 04-NOV-2011 (Rel. 110, Last updated, Version 3)   |
| STREJ | 945704  | <i>Streptococcus suis</i> (strain JS14)                                            | EBI            | 01-MAY-2011 (Rel. 108, Last updated, Version 2)   |
| STREM | 552526  | <i>Streptococcus equi</i> subsp. zoepidemicus (strain MGCS10565)                   | Genome Reviews | 25-NOV-2008 (Rel. 99, Last updated, Version 2)    |
| STRG3 | 637909  | <i>Streptococcus gallolyticus</i> (strain UCN34)                                   | Genome Reviews | 15-JUN-2010 (Rel. 122, Last updated, Version 2)   |
| STRGC | 467705  | <i>Streptococcus gordonii</i> (strain Challis / ATCC 35105 / CH1 / DL1 / V288)     | Genome Reviews | 26-FEB-2008 (Rel. 87, Last updated, Version 2)    |
| STRM6 | 365659  | <i>Streptococcus mitis</i> (strain B6)                                             | Genome Reviews | 08-MAR-2011 (Rel. 129, Last updated, Version 9)   |
| STRMN | 511691  | <i>Streptococcus mutans</i> serotype c (strain NN2025)                             | EBI            | 02-AUG-2009 (Rel. 101, Last updated, Version 1)   |
| STRMU | 210007  | <i>Streptococcus mutans</i> serotype c (strain ATCC 700610 / UA159)                | Genome Reviews | 02-MAR-2010 (Rel. 118, Last updated, Version 118) |
| STRP0 | 525381  | <i>Streptococcus pneumoniae</i> serotype A19 (strain TCH8431)                      | Genome Reviews | 08-MAR-2011 (Rel. 129, Last updated, Version 5)   |
| STRP1 | 160490  | <i>Streptococcus pyogenes</i> serotype M1                                          | Genome Reviews | 24-NOV-2009 (Rel. 114, Last updated, Version 114) |
| STRP2 | 373153  | <i>Streptococcus pneumoniae</i> serotype 2 (strain D39 / NCTC 7466)                | EBI            | 20-DEC-2006 (Rel. 90, Last updated, Version 2)    |
| STRP3 | 198466  | <i>Streptococcus pyogenes</i> serotype M3 (strain ATCC BAA-595 / MGAS315)          | Genome Reviews | 02-MAR-2010 (Rel. 118, Last updated, Version 118) |
| STRP4 | 512566  | <i>Streptococcus pneumoniae</i> serotype 19F (strain G54)                          | Genome Reviews | 16-DEC-2008 (Rel. 100, Last updated, Version 2)   |
| STRP6 | 286636  | <i>Streptococcus pyogenes</i> serotype M6 (strain ATCC BAA-946 / MGAS10394)        | EBI            | 17-APR-2005 (Rel. 83, Last updated, Version 2)    |
| STRP7 | 488221  | <i>Streptococcus pneumoniae</i> (strain 70585)                                     | Genome Reviews | 25-MAY-2010 (Rel. 121, Last updated, Version 14)  |
| STRP8 | 186103  | <i>Streptococcus pyogenes</i> serotype M18 (strain MGAS8232)                       | NCBI           | NC_003485.1 GI:19745201                           |

|       |        |                                                                          |                |                                                   |
|-------|--------|--------------------------------------------------------------------------|----------------|---------------------------------------------------|
| STRPB | 370553 | <i>Streptococcus pyogenes</i> serotype M12 (strain MGAS2096)             | EBI            | 31-MAY-2006 (Rel. 88, Last updated, Version 2)    |
| STRPC | 370551 | <i>Streptococcus pyogenes</i> serotype M12 (strain MGAS9429)             | EBI            | 31-MAY-2006 (Rel. 88, Last updated, Version 2)    |
| STRPD | 370552 | <i>Streptococcus pyogenes</i> serotype M2 (strain MGAS10270)             | EBI            | 31-MAY-2006 (Rel. 88, Last updated, Version 2)    |
| STRPF | 370554 | <i>Streptococcus pyogenes</i> serotype M4 (strain MGAS10750)             | EBI            | 31-MAY-2006 (Rel. 88, Last updated, Version 2)    |
| STRPG | 160491 | <i>Streptococcus pyogenes</i> serotype M5 (strain Manfredo)              | Genome Reviews | 17-APR-2007 (Rel. 72, Last updated, Version 3)    |
| STRPI | 487214 | <i>Streptococcus pneumoniae</i> (strain Hungary19A-6)                    | Genome Reviews | 01-JUL-2008 (Rel. 93, Last updated, Version 3)    |
| STRPJ | 561276 | <i>Streptococcus pneumoniae</i> (strain ATCC 700669 / Spain 23F-1)       | Genome Reviews | 24-NOV-2009 (Rel. 114, Last updated, Version 9)   |
| STRPM | 319701 | <i>Streptococcus pyogenes</i> serotype M28 (strain MGAS6180)             | EBI            | 19-AUG-2005 (Rel. 84, Last updated, Version 2)    |
| STRPN | 170187 | <i>Streptococcus pneumoniae</i> serotype 4 (strain ATCC BAA-334 / TIGR4) | Genome Reviews | 02-MAR-2010 (Rel. 118, Last updated, Version 118) |
| STRPS | 516950 | <i>Streptococcus pneumoniae</i> (strain CGSP14)                          | Genome Reviews | 01-JUL-2008 (Rel. 93, Last updated, Version 1)    |
| STRPZ | 471876 | <i>Streptococcus pyogenes</i> serotype M49 (strain NZ131)                | Genome Reviews | 16-DEC-2008 (Rel. 100, Last updated, Version 1)   |
| STRR6 | 171101 | <i>Streptococcus pneumoniae</i> (strain ATCC BAA-255 / R6)               | NCBI           | NC_003098.1 GI:15902044                           |
| STRS2 | 391296 | <i>Streptococcus suis</i> (strain 98HAH33)                               | Genome Reviews | 26-JUN-2007 (Rel. 76, Last updated, Version 1)    |
| STRS4 | 568814 | <i>Streptococcus suis</i> (strain BM407)                                 | Genome Reviews | 15-JUN-2010 (Rel. 122, Last updated, Version 12)  |
| STRS7 | 553483 | <i>Streptococcus equi</i> subsp. zoepidemicus (strain H70)               | EBI            | 27-MAR-2009 (Rel. 100, Last updated, Version 2)   |
| STRSE | 218494 | <i>Streptococcus suis</i> (strain P1/7)                                  | Genome Reviews | 13-OCT-2009 (Rel. 112, Last updated, Version 2)   |
| STRSV | 388919 | <i>Streptococcus sanguinis</i> (strain SK36)                             | Genome Reviews | 17-APR-2007 (Rel. 72, Last updated, Version 1)    |
| STRSX | 568813 | <i>Streptococcus suis</i> (strain SC84)                                  | Genome Reviews | 13-OCT-2009 (Rel. 112, Last updated, Version 2)   |
| STRSY | 391295 | <i>Streptococcus suis</i> (strain 05ZYH33)                               | Genome Reviews | 26-JUN-2007 (Rel. 76, Last updated, Version 1)    |
| STRT1 | 299768 | <i>Streptococcus thermophilus</i> (strain CNRZ 1066)                     | EBI            | 17-APR-2005 (Rel. 83, Last updated, Version 4)    |
| STRT2 | 264199 | <i>Streptococcus thermophilus</i> (strain ATCC BAA-250 / LMG 18311)      | EBI            | 17-APR-2005 (Rel. 83, Last updated, Version 5)    |
| STRTD | 322159 | <i>Streptococcus thermophilus</i> (strain ATCC BAA-491 / LMD-9)          | EBI            | 04-NOV-2006 (Rel. 89, Last updated, Version 3)    |
| STRU0 | 218495 | <i>Streptococcus uberis</i> (strain ATCC BAA-854 / 0140J)                | Genome Reviews | 24-NOV-2009 (Rel. 114, Last updated, Version 8)   |
| STRZI | 869269 | <i>Streptococcus pneumoniae</i> serotype 1 (strain INV104)               | Genome Reviews | 08-MAR-2011 (Rel. 129, Last updated, Version 1)   |
| STRZJ | 488222 | <i>Streptococcus pneumoniae</i> (strain JJA)                             | Genome Reviews | 07-JUL-2009 (Rel. 108, Last updated, Version 2)   |

|       |        |                                                            |                |                                                 |
|-------|--------|------------------------------------------------------------|----------------|-------------------------------------------------|
| STRZO | 869215 | <i>Streptococcus pneumoniae</i> serotype 3 (strain OXC141) | Genome Reviews | 07-JUN-2011 (Rel. 130, Last updated, Version 2) |
| STRZP | 488223 | <i>Streptococcus pneumoniae</i> (strain P1031)             | Genome Reviews | 16-JUN-2009 (Rel. 107, Last updated, Version 1) |
| STRZT | 487213 | <i>Streptococcus pneumoniae</i> (strain Taiwan19F-14)      | Genome Reviews | 24-NOV-2009 (Rel. 114, Last updated, Version 5) |

**Table T2.** Genome list formatted for *download\_genomes\_ncbi.pl* in order to download the corresponding sequences used in the work of Lefebure and Stanhope (2007) Genome Biol 8:R71.

| Accession GenomeName                   | CDSs reported by Lefebure and Stanhope (2007) | CDSs with current GenBank genome annotations, if different |
|----------------------------------------|-----------------------------------------------|------------------------------------------------------------|
| NC_008022 <i>S.pyogenes</i> _MGAS10270 | 1987                                          | 1986                                                       |
| NC_008024 <i>S.pyogenes</i> _MGAS10750 | 1979                                          | 1978                                                       |
| NC_008023 <i>S.pyogenes</i> _MGAS2096  | 1898                                          | equal                                                      |
| NC_008021 <i>S.pyogenes</i> _MGAS9429  | 1877                                          | equal                                                      |
| NC_002737 <i>S.pyogenes</i> _M1GAS     | 1697                                          | 1696                                                       |
| NC_007297 <i>S.pyogenes</i> _MGAS5005  | 1865                                          | equal                                                      |
| NC_003485 <i>S.pyogenes</i> _MGAS8232  | 1845                                          | 1839                                                       |
| NC_007296 <i>S.pyogenes</i> _MGAS6180  | 1894                                          | equal                                                      |
| NC_004070 <i>S.pyogenes</i> _MGAS315   | 1865                                          | equal                                                      |
| NC_004606 <i>S.pyogenes</i> _SSI-1     | 1861                                          | 1859                                                       |
| NC_006086 <i>S.pyogenes</i> _MGAS10394 | 1886                                          | equal                                                      |
| NC_003098 <i>S.pneumoniae</i> _R6      | 2043                                          | 2042                                                       |
| NC_003028 <i>S.pneumoniae</i> _TIGR4   | 2094                                          | 2105                                                       |
| NC_004350 <i>S.mutans</i> _UA159       | 1960                                          | equal                                                      |
| NC_004116 <i>S.agalactiae</i> _2603VR  | 2124                                          | equal                                                      |
| NC_007432 <i>S.agalactiae</i> _A909    | 1996                                          | equal                                                      |
| NC_004368 <i>S.agalactiae</i> _NEM316  | 2094                                          | equal                                                      |
| AAJP <i>S.agalactiae</i> _515          | 2275                                          | equal                                                      |
| AAJQ <i>S.agalactiae</i> _CJB111       | 2197                                          | equal                                                      |

|                                            |      |       |
|--------------------------------------------|------|-------|
| AAJR <i>S.agalactiae</i> _COH1             | 2376 | equal |
| AAJS <i>S.agalactiae</i> _H36B             | 2376 | equal |
| AAJO <i>S.agalactiae</i> _18RS21           | 2146 | equal |
| AAFA <i>S.suis</i> _891591                 | 1896 | 2119  |
| NC_006449 <i>S.thermophilus</i> _CNRZ1066  | 1915 | equal |
| NC_006448 <i>S.thermophilus</i> _LMG 18311 | 1889 | 1888  |
| NC_008532 <i>S.thermophilus</i> _LMD-9     | 1835 | 1709  |

**Table T3.** Consensus core-genes of 50 *Streptococcus* genomes produced by all BDBH, COGtriangles and OMCL with 75% alignment coverage. Gene identifiers correspond to *Streptococcus pyogenes* serotype M1, release 114, as downloaded from OMAbrowser. A file with the corresponding full sequence clusters is available from <http://www.eead.csic.es/compbio/soft/gethoms.php>.

STRP100001,STRP100005,STRP100009,STRP100010,STRP100011,STRP100014,STRP100015,STRP100016,STRP100017,STRP100018,STRP100019,STRP100020,STRP100021,STRP100024,STRP100025,STRP100026,STRP100030,STRP100031,STRP100032,STRP100042,STRP100043,STRP100044,STRP100045,STRP100046,STRP100047,STRP100048,STRP100049,STRP100051,STRP100052,STRP100053,STRP100054,STRP100055,STRP100056,STRP100058,STRP100061,STRP100063,STRP100066,STRP100067,STRP100070,STRP100072,STRP100073,STRP100074,STRP100079,STRP100081,STRP100084,STRP100085,STRP100089,STRP100090,STRP100119,STRP100128,STRP100140,STRP100152,STRP100159,STRP100163,STRP100164,STRP100179,STRP100191,STRP100192,STRP100195,STRP100196,STRP100197,STRP100200,STRP100201,STRP100202,STRP100207,STRP100208,STRP100210,STRP100211,STRP100212,STRP100213,STRP100214,STRP100221,STRP100223,STRP100224,STRP100225,STRP100226,STRP100227,STRP100230,STRP100233,STRP100234,STRP100237,STRP100239,STRP100242,STRP100244,STRP100245,STRP100246,STRP100247,STRP100249,STRP100250,STRP100253,STRP100258,STRP100259,STRP100260,STRP100262,STRP100263,STRP100264,STRP100265,STRP100266,STRP100267,STRP100270,STRP100274,STRP100275,STRP100276,STRP100283,STRP100289,STRP100291,STRP100295,STRP100300,STRP100303,STRP100316,STRP100317,STRP100319,STRP100326,STRP100328,STRP100330,STRP100331,STRP100332,STRP100334,STRP100338,STRP100339,STRP100341,STRP100352,STRP100353,STRP100357,STRP100358,STRP100359,STRP100368,STRP100370,STRP100371,STRP100379,STRP100380,STRP100381,STRP100382,STRP100408,STRP100415,STRP100421,STRP100422,STRP100426,STRP100427,STRP100429,STRP100431,STRP100432,STRP100439,STRP100441,STRP100442,STRP100445,STRP100448,STRP100464,STRP100465,STRP100468,STRP100469,STRP100470,STRP100471,STRP100472,STRP100520,STRP100523,STRP100524,STRP100525,STRP100526,STRP100528,STRP100530,STRP100531,STRP100533,STRP100547,STRP100548,STRP100550,STRP100552,STRP100553,STRP100554,STRP100556,STRP100557,STRP100559,STRP100562,STRP100563,STRP100569,STRP100574,STRP100575,STRP100576,STRP100592,STRP100593,STRP100594,STRP100595,STRP100596,STRP100598,STRP100599,STRP100600,STRP100601,STRP100605,STRP100606,STRP100610,STRP100611,STRP100614,STRP100616,STRP100617,STRP100618,STRP100623,STRP100624,STRP100631,STRP100642,STRP100643,

STRP100649,STRP100650,STRP100651,STRP100652,STRP100654,STRP100655,STRP100656,STRP100658,STRP100662,STRP100663,  
STRP100665,STRP100670,STRP100671,STRP100675,STRP100676,STRP100677,STRP100689,STRP100690,STRP100691,STRP100692,  
STRP100693,STRP100695,STRP100696,STRP100698,STRP100759,STRP100761,STRP100762,STRP100763,STRP100767,STRP100777,  
STRP100779,STRP100781,STRP100783,STRP100785,STRP100806,STRP100810,STRP100830,STRP100831,STRP100833,STRP100846,  
STRP100847,STRP100848,STRP100852,STRP100853,STRP100861,STRP100862,STRP100864,STRP100865,STRP100868,STRP100869,  
STRP100870,STRP100874,STRP100881,STRP100883,STRP100884,STRP100886,STRP100909,STRP100911,STRP100912,STRP100913,  
STRP100915,STRP100923,STRP100931,STRP100935,STRP100936,STRP100937,STRP100940,STRP100941,STRP100942,STRP100948,  
STRP100949,STRP100955,STRP100956,STRP100971,STRP100979,STRP100983,STRP101005,STRP101010,STRP101019,STRP101028,  
STRP101030,STRP101035,STRP101037,STRP101038,STRP101040,STRP101050,STRP101051,STRP101054,STRP101059,STRP101061,  
STRP101063,STRP101064,STRP101065,STRP101066,STRP101072,STRP101073,STRP101076,STRP101083,STRP101084,STRP101088,  
STRP101089,STRP101090,STRP101143,STRP101146,STRP101148,STRP101149,STRP101150,STRP101151,STRP101159,STRP101160,  
STRP101161,STRP101164,STRP101165,STRP101169,STRP101170,STRP101174,STRP101181,STRP101182,STRP101206,STRP101218,  
STRP101236,STRP101238,STRP101241,STRP101242,STRP101243,STRP101246,STRP101248,STRP101249,STRP101250,STRP101253,  
STRP101254,STRP101261,STRP101263,STRP101265,STRP101266,STRP101267,STRP101268,STRP101269,STRP101270,STRP101275,  
STRP101276,STRP101277,STRP101278,STRP101279,STRP101280,STRP101293,STRP101294,STRP101295,STRP101298,STRP101303,  
STRP101316,STRP101317,STRP101318,STRP101319,STRP101320,STRP101322,STRP101323,STRP101324,STRP101326,STRP101328,  
STRP101330,STRP101331,STRP101335,STRP101337,STRP101338,STRP101341,STRP101343,STRP101344,STRP101345,STRP101347,  
STRP101348,STRP101350,STRP101351,STRP101352,STRP101354,STRP101360,STRP101361,STRP101362,STRP101364,STRP101366,  
STRP101371,STRP101383,STRP101384,STRP101385,STRP101390,STRP101391,STRP101394,STRP101396,STRP101398,STRP101400,  
STRP101401,STRP101402,STRP101403,STRP101405,STRP101409,STRP101410,STRP101412,STRP101413,STRP101416,STRP101417,  
STRP101419,STRP101421,STRP101424,STRP101426,STRP101429,STRP101436,STRP101439,STRP101440,STRP101441,STRP101444,  
STRP101447,STRP101449,STRP101452,STRP101456,STRP101458,STRP101459,STRP101486,STRP101488,STRP101491,STRP101501,  
STRP101504,STRP101505,STRP101507,STRP101508,STRP101517,STRP101522,STRP101524,STRP101527,STRP101573,STRP101575,  
STRP101581,STRP101595,STRP101596,STRP101597,STRP101603,STRP101604,STRP101606,STRP101610,STRP101611,STRP101612,  
STRP101615,STRP101636,STRP101643,STRP101644,STRP101645,STRP101659,STRP101660,STRP101662,STRP101664,STRP101668,  
STRP101675,STRP101677,STRP101678,STRP101683,STRP101685,STRP101691

**Table T4.** Sets of core-genome protein families estimated by BDBH, OMCL and COG strategies for 50 *Streptococcus* proteomes downloaded from OMA browser. All 177 core genes annotated by OMA (OMAc, <http://omabrowser.org/All/oma-groups.txt.gz>) were successfully retrieved by OMCL and COGS, in 176 clusters, after merging two paralogous copies of topoisomerase 4 subunit A in a single cluster. The same result was obtained by BDBH after lowering alignment coverage to 50% from default 75%. However, 6 sequences from OMAc were not found among consensus clusters, due to different groupings of inparalogs by BDBH (5 cases) and OMCL (1 case). Of the 611 core clusters published by Lefébure & Stanhope in 2007 for 26 genomes, 343, 365 and 373 exactly matched GET\_HOMOLOGUES clusters, respectively. Note that their

clustering procedure included a post-processing step, as they produced global CLUSTAL alignments of nucleotides sequences and applied sequence identity cutoffs to call orthologues. Furthermore, the dataset used by Lefébure & Stanhope contained only 26 genomes from 6 species, making their core-genome size estimate necessarily larger.

|                                                                               | BDBH | OMCL | COG | consensus |
|-------------------------------------------------------------------------------|------|------|-----|-----------|
| <i>get_homologues.pl</i><br>(50 genomes, 14 species, 75 % alignment coverage) | 487  | 521  | 538 | 456       |
| same string of Pfam domains                                                   | 391  | 413  | 428 | 364       |
| OMAc (177 core genes)                                                         | 176  | 176  | 176 | 170       |
| Lefébure & Stanhope<br>(26 genomes, 611 genes, 6 species)                     | 343  | 365  | 373 | 324       |

**Table T5.** AutoFACT annotation of 286 consensus core-genes of 50 *Streptococcus* genomes, produced by BDBH, COGtriangles and OMCL with 75% alignment coverage, which are not included in OMAc.

| OMA ID     | Gene                           | Subject title                                                                                            | E-score   | Source DB |
|------------|--------------------------------|----------------------------------------------------------------------------------------------------------|-----------|-----------|
| STRA100001 | dnaA                           | Chromosomal replication initiator protein DnaA n=10<br>Tax=Streptococcus agalactiae ReplD=DNAA_STRA1     | 0         | uniref90  |
| STRA100007 | PTH                            | Peptidyl-tRNA hydrolase n=10 Tax=Streptococcus agalactiae<br>ReplD=PTH_STRA1                             | 1.00E-105 | uniref90  |
| STRA100013 | TILS                           | tRNA(Ile)-lysine synthase n=11 Tax=Streptococcus agalactiae<br>ReplD=TILS_STRA3                          | 0         | uniref90  |
| STRA100015 | ftsH                           | ATP-dependent zinc metalloprotease FtsH n=10 Tax=Streptococcus agalactiae<br>ReplD=E7S155_STRAG          | 0         | uniref90  |
| STRA100017 | KPRS1                          | Ribose-phosphate pyrophosphokinase 1 n=36 Tax=Streptococcus<br>ReplD=KPRS1_STRA3                         | 1.00E-164 | uniref90  |
| STRA100022 | acyl carrier protein, putative | Acyl carrier protein 2 n=10 Tax=Streptococcus agalactiae<br>ReplD=E7S7A7_STRAG                           | 2.00E-36  | uniref90  |
| STRA100023 | PUR7                           | Phosphoribosylaminoimidazole-succinocarboxamide synthase n=24<br>Tax=Streptococcus ReplD=PUR7_STRA1      | 1.00E-133 | uniref90  |
| STRA100025 | purF                           | Amidophosphoribosyltransferase n=26 Tax=Streptococcus<br>ReplD=Q1J937_STRPF                              | 0         | uniref90  |
| STRA100026 | PUR5                           | Phosphoribosylformylglycinamide cyclo-ligase n=8<br>Tax=Streptococcus ReplD=PUR5_STRPB                   | 1.00E-176 | uniref90  |
| STRA100043 | purE                           | Phosphoribosylaminoimidazole carboxylase, catalytic subunit n=23<br>Tax=Streptococcus ReplD=Q3D3T6_STRAG | 4.00E-80  | uniref90  |
| STRA100049 |                                | Phosphotyrosine protein phosphatase n=10 Tax=Streptococcus agalactiae<br>ReplD=E7S775_STRAG              | 5.00E-82  | uniref90  |
| STRA100065 | 50S ribosomal protein L29      | 50S ribosomal protein L29 n=84 Tax=Streptococcus<br>ReplD=RL29_STRMU                                     | 1.00E-17  | uniref90  |
| STRA100075 | rpmD                           | 50S ribosomal protein L30 n=73 Tax=Streptococcus<br>ReplD=RL30_STRE4                                     | 1.00E-23  | uniref90  |
| STRA100078 | KAD                            | Adenylate kinase n=24 Tax=Streptococcus ReplD=KAD_STRP3                                                  | 1.00E-117 | uniref90  |
| STRA100080 | rpsM                           | 30S ribosomal protein S13 n=260 Tax=Streptococcus<br>ReplD=RS13_STRE4                                    | 5.00E-53  | uniref90  |
| STRA100082 | RPOA                           | DNA-directed RNA polymerase subunit alpha n=68<br>Tax=Streptococcus ReplD=RPOA_STRP1                     | 1.00E-173 | uniref90  |
| STRA100094 | dnaK                           | Chaperone protein DnaK n=267 Tax=Streptococcus                                                           | 0         | uniref90  |

|            |                                           |                                                                                                                         |           |          |
|------------|-------------------------------------------|-------------------------------------------------------------------------------------------------------------------------|-----------|----------|
|            |                                           | RepID=DNAK_STRMU                                                                                                        |           |          |
| STRA100095 | dnaJ                                      | Chaperone protein DnaJ n=11 Tax=Streptococcus agalactiae<br>RepID=DNAJ_STRAG3                                           | 0         | uniref90 |
| STRA100097 | TRUA                                      | tRNA pseudouridine synthase A n=10 Tax=Streptococcus agalactiae<br>RepID=TRUA_STRAG1                                    | 1.00E-151 | uniref90 |
| STRA100098 |                                           | Phosphomethylpyrimidine kinase n=10 Tax=Streptococcus agalactiae<br>RepID=E7S721_STRAG                                  | 1.00E-143 | uniref90 |
| STRA100139 | UPPP                                      | Undecaprenyl-diphosphatase n=10 Tax=Streptococcus agalactiae<br>RepID=UPPP_STRAG1                                       | 1.00E-149 | uniref90 |
| STRA100140 |                                           | Adapter protein mecA n=9 Tax=Streptococcus agalactiae<br>RepID=MECA_STRAG1                                              | 1.00E-131 | uniref90 |
| STRA100144 | sufS                                      | Cysteine desulfurase n=10 Tax=Streptococcus agalactiae<br>RepID=E7S6Y0_STRAG                                            | 0         | uniref90 |
| STRA100145 | NifU family protein                       | NifU family SUF system FeS assembly protein n=10<br>Tax=Streptococcus agalactiae RepID=E7S6X9_STRAG                     | 4.00E-82  | uniref90 |
| STRA100156 | zinc ABC transporter, ATP-binding protein | Zinc ABC superfamily ATP binding cassette transporter, ABC protein n=10 Tax=Streptococcus agalactiae RepID=E7S6W7_STRAG | 1.00E-138 | uniref90 |
| STRA100160 | penicillin-binding protein 1B             | Penicillin-binding protein 1B n=14 Tax=Streptococcus agalactiae<br>RepID=B2NHG3_STRAG                                   | 0         | uniref90 |
| STRA100163 |                                           | DUF1033 multi-domain protein                                                                                            | 5.00E-39  | CDD      |
| STRA100164 | cglA                                      | Competence protein ComGA n=9 Tax=Streptococcus agalactiae<br>RepID=E7S6V8_STRAG                                         | 0         | uniref90 |
| STRA100169 | competence protein ComGF                  | Competence protein ComGF n=10 Tax=Streptococcus agalactiae<br>RepID=F8XY10_STRAG                                        | 4.00E-66  | uniref90 |
| STRA100171 |                                           | Adenine-specific methyltransferase n=10 Tax=Streptococcus agalactiae RepID=E7S6V1_STRAG                                 | 1.00E-170 | uniref90 |
| STRA100177 | proC                                      | Pyrroline-5-carboxylate reductase n=10 Tax=Streptococcus agalactiae RepID=E7S6U7_STRAG                                  | 1.00E-144 | uniref90 |
| STRA100178 | pepA                                      | Glutamyl aminopeptidase n=10 Tax=Streptococcus agalactiae<br>RepID=E7S6U6_STRAG                                         | 0         | uniref90 |
| STRA100206 | cysE                                      | Serine acetyltransferase n=10 Tax=Streptococcus agalactiae<br>RepID=E7S6R7_STRAG                                        | 4.00E-95  | uniref90 |
| STRA100209 |                                           | Ribonuclease III n=10 Tax=Streptococcus agalactiae<br>RepID=E7S6R4_STRAG                                                | 4.00E-69  | uniref90 |
| STRA100210 |                                           | TrmH family RNA methyltransferase n=10 Tax=Streptococcus agalactiae RepID=E7S6R3_STRAG                                  | 1.00E-143 | uniref90 |
| STRA100260 | nagA                                      | N-acetylglucosamine-6-phosphate deacetylase n=10<br>Tax=Streptococcus agalactiae RepID=E7S6J9_STRAG                     | 0         | uniref90 |
| STRA100278 | PROA                                      | Gamma-glutamyl phosphate reductase n=11 Tax=Streptococcus agalactiae RepID=PROA_STRAG1                                  | 0         | uniref90 |
| STRA100280 |                                           | Cell division protein FtsL n=10 Tax=Streptococcus agalactiae<br>RepID=E7S6E4_STRAG                                      | 6.00E-55  | uniref90 |
| STRA100281 | pbpX                                      | Penicillin-binding protein 2X n=31 Tax=Streptococcus agalactiae<br>RepID=B2NHG6_STRAG                                   | 0         | uniref90 |
| STRA100282 | MRAY                                      | Phospho-N-acetylmuramoyl-pentapeptide-transferase n=10<br>Tax=Streptococcus agalactiae RepID=MRAY_STRAG1                | 1.00E-177 | uniref90 |
| STRA100283 |                                           | DEAD-box ATP dependent DNA helicase n=5 Tax=Streptococcus agalactiae RepID=F8XYE2_STRAG                                 | 0         | uniref90 |
| STRA100290 | NADE                                      | NH(3)-dependent NAD(+) synthetase n=10 Tax=Streptococcus agalactiae RepID=NADE_STRAG1                                   | 1.00E-156 | uniref90 |
| STRA100291 | pepC                                      | Amino peptidase C n=10 Tax=Streptococcus agalactiae<br>RepID=E7S6D2_STRAG                                               | 0         | uniref90 |
| STRA100292 | pbp1A                                     | Penicillin-binding protein 1A n=21 Tax=Streptococcus agalactiae<br>RepID=Q8E1Q5_STRAG5                                  | 0         | uniref90 |
| STRA100293 | recU                                      | Holliday junction resolvase recU n=11 Tax=Streptococcus agalactiae<br>RepID=RECU_STRAG1                                 | 1.00E-106 | uniref90 |
| STRA100296 |                                           | Site-specific DNA-methyltransferase n=8 Tax=Streptococcus agalactiae RepID=E7S6C7_STRAG                                 | 0         | uniref90 |
| STRA100298 | LUXS                                      | S-ribosylhomocysteine lyase n=24 Tax=Streptococcus<br>RepID=LUXS_STRAG1                                                 | 4.00E-81  | uniref90 |
| STRA100308 | FMT                                       | Methionyl-tRNA formyltransferase n=10 Tax=Streptococcus agalactiae RepID=FMT_STRAG1                                     | 1.00E-179 | uniref90 |
| STRA100309 | sun                                       | RNA methyltransferase Sun n=11 Tax=Streptococcus agalactiae<br>RepID=E7S6B3_STRAG                                       | 0         | uniref90 |
| STRA100310 |                                           | Protein phosphatase 2C n=12 Tax=Streptococcus agalactiae<br>RepID=F8XYG9_STRAG                                          | 1.00E-138 | uniref90 |



|            |                                                      |                                                                                                                    |           |          |
|------------|------------------------------------------------------|--------------------------------------------------------------------------------------------------------------------|-----------|----------|
| STRA100326 | cysK                                                 | Cysteine synthase n=10 Tax=Streptococcus agalactiae<br>ReplD=E7S696_STRAG                                          | 1.00E-156 | uniref90 |
| STRA100327 |                                                      | Xaa-Pro dipeptidase n=10 Tax=Streptococcus agalactiae<br>ReplD=E7S695_STRAG                                        | 1.00E-118 | uniref90 |
| STRA100330 | yfiA                                                 | Ribosomal subunit interface protein n=10 Tax=Streptococcus<br>agalactiae ReplD=E7S692_STRAG                        | 1.00E-99  | uniref90 |
| STRA100333 |                                                      | Enoyl-CoA hydratase/isomerase n=9 Tax=Streptococcus agalactiae<br>ReplD=E7S689_STRAG                               | 1.00E-120 | uniref90 |
| STRA100335 | FABH                                                 | 3-oxoacyl-[acyl-carrier-protein] synthase 3 n=9 Tax=Streptococcus<br>agalactiae ReplD=FABH_STRAG1                  | 0         | uniref90 |
| STRA100338 |                                                      | Malonyl CoA-acyl carrier protein transacylase n=10<br>Tax=Streptococcus agalactiae ReplD=E7S684_STRAG              | 1.00E-175 | uniref90 |
| STRA100339 | fabG                                                 | 3-oxoacyl-[acyl-carrier-protein] reductase n=10 Tax=Streptococcus<br>agalactiae ReplD=E7S683_STRAG                 | 1.00E-135 | uniref90 |
| STRA100340 | fabF                                                 | 3-oxoacyl-[acyl-carrier-protein] synthase 2 n=10 Tax=Streptococcus<br>agalactiae ReplD=E7S682_STRAG                | 0         | uniref90 |
| STRA100342 | fabZ                                                 | (3R)-hydroxymyristoyl-[acyl-carrier-protein] dehydratase n=14<br>Tax=Streptococcus ReplD=FABZ_STRE4                | 2.00E-69  | uniref90 |
| STRA100347 | SYS                                                  | Serine--tRNA ligase n=11 Tax=Streptococcus agalactiae<br>ReplD=SYS_STRAG1                                          | 0         | uniref90 |
| STRA100350 | PTS system,<br>mannose-<br>specific IID<br>component | PTS system, mannose-specific IID component n=9 Tax=Streptococcus<br>agalactiae ReplD=Q3D755_STRAG                  | 1.00E-151 | uniref90 |
| STRA100356 | xanthine/uracil<br>permease<br>family protein        | xanthine/uracil permease family protein; K06901 putative MFS<br>transporter, AGZA family, xanthine/uracil permease | 0         | kegg     |
| STRA100357 |                                                      | ATP/GTP hydrolase n=8 Tax=Streptococcus agalactiae<br>ReplD=E7S664_STRAG                                           | 3.00E-84  | uniref90 |
| STRA100359 |                                                      | LytR family transcriptional regulator n=11 Tax=Streptococcus<br>agalactiae ReplD=E7S662_STRAG                      | 0         | uniref90 |
| STRA100361 | hit                                                  | HIT family protein n=10 Tax=Streptococcus agalactiae<br>ReplD=E7S660_STRAG                                         | 3.00E-76  | uniref90 |
| STRA100365 |                                                      | Phosphotransferase enzyme family protein n=10 Tax=Streptococcus<br>agalactiae ReplD=E7S656_STRAG                   | 1.00E-155 | uniref90 |
| STRA100368 | nusA                                                 | Transcription termination factor NusA n=10 Tax=Streptococcus<br>agalactiae ReplD=E7S653_STRAG                      | 0         | uniref90 |
| STRA100370 |                                                      | 50S ribosomal protein L7/L12 n=10 Tax=Streptococcus agalactiae<br>ReplD=E7S651_STRAG                               | 1.00E-50  | uniref90 |
| STRA100371 | infB                                                 | Translation initiation factor IF-2 n=19 Tax=Streptococcus agalactiae<br>ReplD=IF2_STRAG1                           | 0         | uniref90 |
| STRA100372 | rbfA                                                 | Ribosome-binding factor A n=11 Tax=Streptococcus agalactiae<br>ReplD=RBFA_STRAG1                                   | 6.00E-61  | uniref90 |
| STRA100378 |                                                      | hydrolase, haloacid dehalogenase-like family                                                                       | 1.00E-156 | kegg     |
| STRA100391 | G6PI                                                 | Glucose-6-phosphate isomerase n=38 Tax=Streptococcus<br>ReplD=G6PI_STRPF                                           | 0         | uniref90 |
| STRA100395 | galU                                                 | Glucose-1-phosphate-uridylyltransferase n=20 Tax=Streptococcus<br>ReplD=DORSA2_9STRE                               | 1.00E-146 | uniref90 |
| STRA100396 | GPDA                                                 | Glycerol-3-phosphate dehydrogenase [NAD(P)+] n=9<br>Tax=Streptococcus agalactiae ReplD=GPDA_STRAG1                 | 0         | uniref90 |
| STRA100398 | membrane<br>protein OxaA,<br>putative                | Membrane protein insertase YidC 1 n=9 Tax=Streptococcus<br>agalactiae ReplD=YIDC1_STRAG3                           | 1.00E-138 | uniref90 |
| STRA100408 |                                                      | Ribonucleoside-diphosphate reductase n=9 Tax=Streptococcus<br>agalactiae ReplD=E7S5U6_STRAG                        | 0         | uniref90 |
| STRA100445 | SYV                                                  | Valine--tRNA ligase n=20 Tax=Streptococcus ReplD=SYV_STRAG1                                                        | 0         | uniref90 |
| STRA100471 | glk                                                  | Glucokinase n=9 Tax=Streptococcus agalactiae<br>ReplD=F8XYV1_STRAG                                                 | 1.00E-166 | uniref90 |
| STRA100475 | MURD                                                 | UDP-N-acetylmuramoylalanine--D-glutamate ligase n=11<br>Tax=Streptococcus agalactiae ReplD=MURD_STRAG1             | 0         | uniref90 |
| STRA100480 |                                                      | Cell division protein YlmE n=10 Tax=Streptococcus agalactiae<br>ReplD=E7S5K1_STRAG                                 | 1.00E-120 | uniref90 |
| STRA100481 |                                                      | [S] COG1799 Uncharacterized protein conserved in bacteria                                                          | 3.00E-53  | cog      |
| STRA100484 | cell division<br>protein DivIVA,<br>putative         | Cell division protein DivIVA n=10 Tax=Streptococcus agalactiae<br>ReplD=E7S5J7_STRAG                               | 1.00E-143 | uniref90 |
| STRA100493 | FOLD                                                 | Bifunctional protein FOLD n=10 Tax=Streptococcus agalactiae<br>ReplD=FOLD_STRAG1                                   | 1.00E-163 | uniref90 |
| STRA100495 | EX7L                                                 | Exodeoxyribonuclease 7 large subunit n=10 Tax=Streptococcus                                                        | 0         | uniref90 |

|            |        |                                                                                                                         |           |               |
|------------|--------|-------------------------------------------------------------------------------------------------------------------------|-----------|---------------|
|            |        | agalactiae RepID=EX7L_STR1                                                                                              |           |               |
| STRA100496 | EX7S   | Exodeoxyribonuclease 7 small subunit n=11 Tax=Streptococcus agalactiae RepID=EX7S_STR1                                  | 4.00E-31  | uniref90      |
| STRA100497 |        | Geranyltransferase n=10 Tax=Streptococcus agalactiae RepID=E7S5M9_STRAG                                                 | 1.00E-164 | uniref90      |
| STRA100501 |        | DegV family protein n=8 Tax=Streptococcus agalactiae RepID=E7S5M4_STRAG                                                 | 1.00E-158 | uniref90      |
| STRA100555 | PYRDA  | Putative dihydroorotate dehydrogenase A (fumarate) n=9 Tax=Streptococcus agalactiae RepID=PYRDA_STR1                    | 0         | uniref90      |
| STRA100559 |        | PRK10513 Putative haloacid dehalogenase-like hydrolase [Erwinia billingiae Eb661]                                       | 1.00E-80  | NCBI clusters |
| STRA100566 | ftsE   | Cell division ATP-binding protein FtsE n=10 Tax=Streptococcus agalactiae RepID=E7S5J1_STRAG                             | 1.00E-130 | uniref90      |
| STRA100567 | ftsX   | Cell division protein FtsX n=10 Tax=Streptococcus agalactiae RepID=E7S5J0_STRAG                                         | 1.00E-139 | uniref90      |
| STRA100572 | aspC   | Aspartate transaminase n=10 Tax=Streptococcus agalactiae RepID=E7S5I4_STRAG                                             | 0         | uniref90      |
| STRA100578 |        | Transporter n=10 Tax=Streptococcus agalactiae RepID=Q3DTC0_STRAG                                                        | 1.00E-150 | uniref90      |
| STRA100583 |        | DHH family protein n=10 Tax=Streptococcus agalactiae RepID=E7S5H3_STRAG                                                 | 0         | uniref90      |
| STRA100601 | gyrB   | DNA gyrase subunit B n=44 Tax=Streptococcus RepID=E4SQY5_STRTN                                                          | 0         | uniref90      |
| STRA100606 | ENO    | Enolase n=350 Tax=Streptococcus RepID=ENO_STRP2                                                                         | 0         | uniref90      |
| STRA100609 | aroK   | Shikimate kinase n=8 Tax=Streptococcus agalactiae RepID=F8XZ46_STRAG                                                    | 1.00E-72  | uniref90      |
| STRA100720 | ccpA   | Catabolite control protein A n=52 Tax=Streptococcus RepID=E7S562_STRAG                                                  | 0         | uniref90      |
| STRA100723 |        | Group 1 glycosyl transferase n=10 Tax=Streptococcus agalactiae RepID=E7S559_STRAG                                       | 0         | uniref90      |
| STRA100724 | SYT    | Threonine--tRNA ligase n=10 Tax=Streptococcus agalactiae RepID=SYT_STR1                                                 | 0         | uniref90      |
| STRA100733 |        | Sensor histidine kinase VicK n=10 Tax=Streptococcus agalactiae RepID=E7S548_STRAG                                       | 0         | uniref90      |
| STRA100737 |        | PRK02224 SMC domain protein [Natrialba magadii ATCC 43099]                                                              | 4.00E-06  | NCBI clusters |
| STRA100739 |        | hydrolase, haloacid dehalogenase-like family                                                                            | 1.00E-149 | kegg          |
| STRA100742 |        | ABC superfamily ATP binding cassette transporter, membrane protein n=11 Tax=Streptococcus agalactiae RepID=E7S539_STRAG | 1.00E-168 | uniref90      |
| STRA100750 | lgt    | Proteoglycan diacylglycerol transferase n=9 Tax=Streptococcus agalactiae RepID=LGT_STR1                                 | 1.00E-137 | uniref90      |
| STRA100765 |        | Phosphoglycerate mutase n=10 Tax=Streptococcus agalactiae RepID=E7S516_STRAG                                            | 1.00E-116 | uniref90      |
| STRA100774 | tufA   | Elongation factor Tu n=341 Tax=Streptococcus RepID=EFTU_STRP3                                                           | 0         | uniref90      |
| STRA100775 | TPIS   | Triosephosphate isomerase n=15 Tax=Streptococcus RepID=TPIS_STR1                                                        | 1.00E-136 | uniref90      |
| STRA100776 |        | 2,3-bisphosphoglycerate-dependent phosphoglycerate mutase n=2 Tax=Streptococcus RepID=F3L8D8_STRPO                      | 1.00E-124 | uniref90      |
| STRA100779 | DDL    | D-alanine--D-alanine ligase n=10 Tax=Streptococcus agalactiae RepID=DDL_STR1                                            | 0         | uniref90      |
| STRA100792 |        | Acyltransferase n=9 Tax=Streptococcus agalactiae RepID=E7S4Y8_STRAG                                                     | 1.00E-132 | uniref90      |
| STRA100799 |        | DNA-directed DNA polymerase III delta subunit n=11 Tax=Streptococcus agalactiae RepID=E7S4Y1_STRAG                      | 0         | uniref90      |
| STRA100811 | NAGB   | Glucosamine-6-phosphate deaminase n=9 Tax=Streptococcus agalactiae RepID=NAGB_STR1                                      | 1.00E-131 | uniref90      |
| STRA100816 | pepB   | Group B oligopeptidase pepB n=9 Tax=Streptococcus agalactiae RepID=PEPB_STR3                                            | 0         | uniref90      |
| STRA100818 |        | O-methyltransferase n=9 Tax=Streptococcus agalactiae RepID=E7S4W2_STRAG                                                 | 1.00E-120 | uniref90      |
| STRA100821 | SYA    | Alanine--tRNA ligase n=25 Tax=Streptococcus RepID=SYA_STRPB                                                             | 0         | uniref90      |
| STRA100828 | nrdF-2 | Ribonucleotide-pyrophosphate reductase subunit beta n=67 Tax=Streptococcus RepID=G5JRK0_STRCG                           | 1.00E-174 | uniref90      |
| STRA100831 | ptsH   | Phosphocarrier protein HPr n=272 Tax=Streptococcus RepID=PTHP_STR1                                                      | 2.00E-30  | uniref90      |
| STRA100832 | PT1    | Phosphoenolpyruvate-protein phosphotransferase n=266 Tax=Streptococcus RepID=PT1_STR1                                   | 0         | uniref90      |
| STRA100839 |        | Biotin--[acetyl-CoA-carboxylase] ligase n=10 Tax=Streptococcus agalactiae RepID=E7S4T9_STRAG                            | 1.00E-179 | uniref90      |

|            |                                                               |                                                                                                                                                     |           |          |
|------------|---------------------------------------------------------------|-----------------------------------------------------------------------------------------------------------------------------------------------------|-----------|----------|
| STRA100840 | METK                                                          | S-adenosylmethionine synthase n=10 Tax=Streptococcus agalactiae<br>ReplID=METK_STR1                                                                 | 0         | uniref90 |
| STRA100852 | MURA1                                                         | UDP-N-acetylglucosamine 1-carboxyvinyltransferase 1 n=12<br>Tax=Streptococcus agalactiae ReplID=MURA1_STR1                                          | 0         | uniref90 |
| STRA100859 | DNLJ                                                          | DNA ligase n=10 Tax=Streptococcus agalactiae ReplID=DNLJ_STR1                                                                                       | 0         | uniref90 |
| STRA100866 | atpE                                                          | ATP synthase F0 sector subunit C n=9 Tax=Streptococcus agalactiae<br>ReplID=E7S4R0_STRAG                                                            | 4.00E-21  | uniref90 |
| STRA100868 | atpF                                                          | ATP synthase subunit b n=12 Tax=Streptococcus agalactiae<br>ReplID=ATPF_STR1                                                                        | 3.00E-78  | uniref90 |
| STRA100869 | atpH                                                          | ATP synthase subunit delta n=10 Tax=Streptococcus agalactiae<br>ReplID=ATPD_STR1                                                                    | 2.00E-97  | uniref90 |
| STRA100870 | ATPA                                                          | ATP synthase subunit alpha n=109 Tax=Streptococcus<br>ReplID=ATPA_STRP1                                                                             | 0         | uniref90 |
| STRA100873 | atpC                                                          | ATP synthase epsilon chain n=10 Tax=Streptococcus agalactiae<br>ReplID=ATPE_STR1                                                                    | 2.00E-62  | uniref90 |
| STRA100882 | ADDB                                                          | ATP-dependent helicase/deoxyribonuclease subunit B n=12<br>Tax=Streptococcus agalactiae ReplID=ADDB_STR1                                            | 0         | uniref90 |
| STRA100894 |                                                               | [S] COG1624 Uncharacterized conserved protein                                                                                                       | 1.00E-112 | cog      |
| STRA100901 |                                                               | HAD-superfamily hydrolase n=11 Tax=Streptococcus agalactiae<br>ReplID=E7S4M5_STRAG                                                                  | 1.00E-144 | uniref90 |
| STRA100920 | dnaE                                                          | DNA-directed DNA polymerase III alpha subunit n=10<br>Tax=Streptococcus agalactiae ReplID=E7S4K4_STRAG                                              | 0         | uniref90 |
| STRA100925 | GLMS                                                          | Glucosamine--fructose-6-phosphate aminotransferase [isomerizing]<br>n=9 Tax=Streptococcus agalactiae ReplID=GLMS_STR3                               | 0         | uniref90 |
| STRA100930 | rpsT                                                          | 30S ribosomal protein S20 n=216 Tax=Streptococcus<br>ReplID=RS20_STRPB                                                                              | 3.00E-28  | uniref90 |
| STRA100935 |                                                               | Ribose ABC superfamily ATP binding cassette transporter, ABC<br>protein n=10 Tax=Streptococcus agalactiae ReplID=E7S4J0_STRAG                       | 0         | uniref90 |
| STRA100936 | sugar ABC<br>transporter,<br>permease<br>protein,<br>putative | Carbohydrate uptake ABC superfamily, ATP binding cassette<br>transporter, membrane protein n=10 Tax=Streptococcus agalactiae<br>ReplID=E7S4I9_STRAG | 1.00E-158 | uniref90 |
| STRA100937 | sugar ABC<br>transporter,<br>permease<br>protein,<br>putative | Carbohydrate uptake ABC superfamily, ATP binding cassette<br>transporter, membrane protein n=10 Tax=Streptococcus agalactiae<br>ReplID=E7S4I8_STRAG | 1.00E-176 | uniref90 |
| STRA100939 | LDH                                                           | L-lactate dehydrogenase n=40 Tax=Streptococcus ReplID=LDH_STRSV                                                                                     | 1.00E-170 | uniref90 |
| STRA100945 | GUAA                                                          | GMP synthase [glutamine-hydrolyzing] n=53 Tax=Streptococcus<br>ReplID=GUAA_STRT1                                                                    | 0         | uniref90 |
| STRA100946 | transcriptional<br>regulator,<br>GntR family                  | GntR family transcriptional regulator n=10 Tax=Streptococcus<br>agalactiae ReplID=E7S4H9_STRAG                                                      | 1.00E-133 | uniref90 |
| STRA100956 |                                                               | Tyrosine recombinase XerS n=10 Tax=Streptococcus agalactiae<br>ReplID=XERS_STR1                                                                     | 0         | uniref90 |
| STRA100961 |                                                               | UPF0122 protein SUB0894 n=1 Tax=Streptococcus uberis 0140J<br>ReplID=B9DUB5_STRU0                                                                   | 3.00E-45  | uniref90 |
| STRA100967 | PSTB2                                                         | Phosphate import ATP-binding protein PstB 2 n=46<br>Tax=Streptococcus ReplID=PSTB2_STRP1                                                            | 1.00E-145 | uniref90 |
| STRA100974 | spxA                                                          | Regulatory protein spx n=9 Tax=Streptococcus agalactiae<br>ReplID=SPX_STR3                                                                          | 5.00E-74  | uniref90 |
| STRA100975 |                                                               | Macrolide-efflux protein n=10 Tax=Streptococcus agalactiae<br>ReplID=O34127_STRAG                                                                   | 0         | uniref90 |
| STRA100983 | topA                                                          | DNA topoisomerase n=10 Tax=Streptococcus agalactiae<br>ReplID=E7S4E1_STRAG                                                                          | 0         | uniref90 |
| STRA100990 | RNH2                                                          | Ribonuclease HII n=10 Tax=Streptococcus agalactiae<br>ReplID=RNH2_STR3                                                                              | 1.00E-128 | uniref90 |
| STRA100991 |                                                               | Ribosome biogenesis GTPase A n=10 Tax=Streptococcus agalactiae<br>ReplID=E7S4D2_STRAG                                                               | 1.00E-160 | uniref90 |
| STRA101015 | CARB                                                          | Carbamoyl-phosphate synthase large chain n=11 Tax=Streptococcus<br>agalactiae ReplID=CARB_STR1                                                      | 0         | uniref90 |
| STRA101016 | CARA                                                          | Carbamoyl-phosphate synthase small chain n=10 Tax=Streptococcus<br>agalactiae ReplID=CARA_STR3                                                      | 0         | uniref90 |
| STRA101017 | PYRB                                                          | Aspartate carbamoyltransferase n=10 Tax=Streptococcus agalactiae<br>ReplID=PYRB_STR1                                                                | 1.00E-180 | uniref90 |
| STRA101018 | pyrC                                                          | Dihydroorotase n=10 Tax=Streptococcus agalactiae<br>ReplID=E7S4A9_STRAG                                                                             | 0         | uniref90 |
| STRA101020 | PYRF                                                          | Orotidine 5'-phosphate decarboxylase n=10 Tax=Streptococcus                                                                                         | 1.00E-135 | uniref90 |

|            |                                                           |                                                                                                                                                     |           |                  |
|------------|-----------------------------------------------------------|-----------------------------------------------------------------------------------------------------------------------------------------------------|-----------|------------------|
|            |                                                           | agalactiae RepID=PYRF_STR1                                                                                                                          |           |                  |
| STRA101027 | FTHS                                                      | Formate-tetrahydrofolate ligase n=9 Tax=Streptococcus agalactiae<br>RepID=FTHS_STR1                                                                 | 0         | uniref90         |
| STRA101042 |                                                           | NA37 domain containing protein                                                                                                                      | 2.00E-15  | pfam             |
| STRA101043 | GLYA                                                      | Serine hydroxymethyltransferase n=10 Tax=Streptococcus agalactiae<br>RepID=GLYA_STR1                                                                | 0         | uniref90         |
| STRA101045 |                                                           | Protein-(Glutamine-N5) methyltransferase n=10 Tax=Streptococcus<br>agalactiae RepID=E7S480_STRAG                                                    | 1.00E-158 | uniref90         |
| STRA101048 | xyIM                                                      | Probable tautomerase spyM18_1099 n=14 Tax=Streptococcus<br>pyogenes RepID=Y1099_STRP8                                                               | 5.00E-26  | uniref90         |
| STRA101049 | ApbE family<br>protein                                    | ApbE family protein n=10 Tax=Streptococcus agalactiae<br>RepID=Q3K116_STR1                                                                          | 0         | uniref90         |
| STRA101061 |                                                           | Pseudouridine synthase n=10 Tax=Streptococcus agalactiae<br>RepID=E7S464_STRAG                                                                      | 1.00E-170 | uniref90         |
| STRA101062 | PPNK                                                      | Probable inorganic polyphosphate/ATP-NAD kinase n=8<br>Tax=Streptococcus agalactiae RepID=PPNK_STR3                                                 | 1.00E-158 | uniref90         |
| STRA101066 |                                                           | Cysteine desulfurase n=10 Tax=Streptococcus agalactiae<br>RepID=E7S459_STRAG                                                                        | 0         | uniref90         |
| STRA101068 |                                                           | Redox-sensing transcriptional repressor rex n=10 Tax=Streptococcus<br>agalactiae RepID=REX_STR3                                                     | 1.00E-119 | uniref90         |
| STRA101077 | potC                                                      | Spermidine/putrescine ABC superfamily ATP binding cassette<br>transporter, permease protein n=10 Tax=Streptococcus agalactiae<br>RepID=E7S447_STRAG | 1.00E-124 | uniref90         |
| STRA101079 | POTA                                                      | Spermidine/putrescine import ATP-binding protein PotA n=14<br>Tax=Streptococcus RepID=POTA_STR1                                                     | 0         | uniref90         |
| STRA101105 | pcrA                                                      | ATP-dependent DNA helicase PcrA n=10 Tax=Streptococcus<br>agalactiae RepID=E7S415_STRAG                                                             | 0         | uniref90         |
| STRA101118 | PLSY                                                      | Glycerol-3-phosphate acyltransferase n=9 Tax=Streptococcus<br>agalactiae RepID=PLSY_STR3                                                            | 6.00E-89  | uniref90         |
| STRA101119 | UNG                                                       | Uracil-DNA glycosylase n=11 Tax=Streptococcus agalactiae<br>RepID=UNG_STR1                                                                          | 1.00E-124 | uniref90         |
| STRA101140 | deoD-2                                                    | Purine nucleoside phosphorylase I n=11 Tax=Streptococcus<br>agalactiae RepID=E7S3X5_STRAG                                                           | 1.00E-154 | uniref90         |
| STRA101142 | RPIA                                                      | Ribose-5-phosphate isomerase A n=9 Tax=Streptococcus agalactiae<br>RepID=RPIA_STR1                                                                  | 1.00E-116 | uniref90         |
| STRA101145 |                                                           | Metallo-beta-lactamase superfamily protein n=11 Tax=Streptococcus<br>agalactiae RepID=E7S3X0_STRAG                                                  | 0         | uniref90         |
| STRA101148 |                                                           | ABC superfamily ATP binding cassette transporter, binding protein<br>n=9 Tax=Streptococcus agalactiae RepID=E7S3W7_STRAG                            | 1.00E-173 | uniref90         |
| STRA101152 |                                                           | Tetratricopeptide (TPR) domain protein n=10 Tax=Streptococcus<br>agalactiae RepID=E7S3W3_STRAG                                                      | 0         | uniref90         |
| STRA101162 |                                                           | SAM-dependent methyltransferase n=11 Tax=Streptococcus<br>agalactiae RepID=E7S3V2_STRAG                                                             | 1.00E-128 | uniref90         |
| STRA101167 |                                                           | Short-chain dehydrogenase/reductase family oxidoreductase n=9<br>Tax=Streptococcus agalactiae RepID=E7S3U7_STRAG                                    | 1.00E-144 | uniref90         |
| STRA101169 |                                                           | PRK05270 galactose-1-phosphate uridylyltransferase [Enterococcus<br>faecalis V583]                                                                  | 5.00E-07  | NCBI<br>clusters |
| STRA101170 | GTP-binding<br>protein                                    | GTPase HflX n=9 Tax=Streptococcus agalactiae<br>RepID=E7S3U4_STRAG                                                                                  | 0         | uniref90         |
| STRA101171 | MIAA                                                      | tRNA dimethylallyltransferase n=10 Tax=Streptococcus agalactiae<br>RepID=MIAA_STR1                                                                  | 1.00E-170 | uniref90         |
| STRA101203 | rplJ                                                      | 50S ribosomal protein L10 n=13 Tax=Streptococcus<br>RepID=RL10_STR1                                                                                 | 4.00E-86  | uniref90         |
| STRA101211 | similar to ATP-<br>dependent Clp<br>protease<br>subunit X | ATP-dependent Clp protease ATP-binding subunit ClpX n=9<br>Tax=Streptococcus RepID=CLPX_STR5                                                        | 0         | uniref90         |
| STRA101213 | folA                                                      | Dihydrofolate reductase n=10 Tax=Streptococcus agalactiae<br>RepID=E7S3R5_STRAG                                                                     | 3.00E-93  | uniref90         |
| STRA101215 |                                                           | Hydroxymethylglutaryl-CoA synthase n=10 Tax=Streptococcus<br>agalactiae RepID=E7S3R3_STRAG                                                          | 0         | uniref90         |
| STRA101218 |                                                           | Hemolysin III n=10 Tax=Streptococcus agalactiae<br>RepID=E7S3Q9_STRAG                                                                               | 1.00E-107 | uniref90         |
| STRA101224 |                                                           | Diphosphomevalonate decarboxylase n=10 Tax=Streptococcus<br>agalactiae RepID=E7S3Q3_STRAG                                                           | 1.00E-167 | uniref90         |
| STRA101225 |                                                           | Mevalonate kinase n=10 Tax=Streptococcus agalactiae<br>RepID=E7S3Q2_STRAG                                                                           | 1.00E-143 | uniref90         |
| STRA101239 |                                                           | ABC superfamily ATP binding cassette transporter, ABC protein n=10<br>Tax=Streptococcus agalactiae RepID=E7S3N6_STRAG                               | 0         | uniref90         |

|            |                                                 |                                                                                                                                                   |           |                  |
|------------|-------------------------------------------------|---------------------------------------------------------------------------------------------------------------------------------------------------|-----------|------------------|
| STRA101240 | CCA                                             | CCA-adding enzyme n=10 Tax=Streptococcus agalactiae<br>ReplID=CCA_STR A3                                                                          | 0         | uniref90         |
| STRA101252 | FENR                                            | Ferredoxin--NADP reductase n=9 Tax=Streptococcus agalactiae<br>ReplID=FENR_STR A1                                                                 | 0         | uniref90         |
| STRA101257 | rpsP                                            | 30S ribosomal protein S16 n=22 Tax=Streptococcus<br>ReplID=RS16_STR A1                                                                            | 2.00E-46  | uniref90         |
| STRA101263 | PYRR                                            | Bifunctional protein pyrR n=9 Tax=Streptococcus agalactiae<br>ReplID=PYRR_STR A1                                                                  | 2.00E-84  | uniref90         |
| STRA101266 |                                                 | LysR family transcriptional regulator n=10 Tax=Streptococcus<br>agalactiae ReplID=E7S3K7_STR AG                                                   | 1.00E-175 | uniref90         |
| STRA101271 | THII                                            | Probable tRNA sulfurtransferase n=10 Tax=Streptococcus agalactiae<br>ReplID=THII_STR A3                                                           | 0         | uniref90         |
| STRA101272 |                                                 | Cysteine desulfurase n=10 Tax=Streptococcus agalactiae<br>ReplID=E7S3K1_STR AG                                                                    | 0         | uniref90         |
| STRA101275 |                                                 | PRK13676 multi-domain protein                                                                                                                     | 5.00E-37  | CDD              |
| STRA101279 |                                                 | Methyltransferase n=11 Tax=Streptococcus agalactiae<br>ReplID=E7S3J4_STR AG                                                                       | 0         | uniref90         |
| STRA101282 | rpml                                            | 50S ribosomal protein L35 n=3 Tax=Streptococcus<br>ReplID=E3CLI6_STR DO                                                                           | 5.00E-25  | uniref90         |
| STRA101285 |                                                 | Unassigned protein                                                                                                                                |           |                  |
| STRA101289 |                                                 | MOP superfamily multidrug/oligosaccharidyl-lipid/polysaccharide<br>flippase transporter n=10 Tax=Streptococcus agalactiae<br>ReplID=E7S3I4_STR AG | 0         | uniref90         |
| STRA101297 | pflA                                            | Pyruvate formate-lyase activating enzyme n=9 Tax=Streptococcus<br>agalactiae ReplID=E7S3H6_STR AG                                                 | 1.00E-142 | uniref90         |
| STRA101298 | CBS domain<br>protein                           | CBS domain protein n=10 Tax=Streptococcus agalactiae<br>ReplID=E7S3H5_STR AG                                                                      | 0         | uniref90         |
| STRA101302 |                                                 | Membrane protein, putative n=10 Tax=Streptococcus agalactiae<br>ReplID=Q3D2E1_STR AG                                                              | 1.00E-89  | uniref90         |
| STRA101326 |                                                 | predicted metal-sulfur cluster biosynthetic enzyme                                                                                                | 4.00E-48  | kegg             |
| STRA101328 | dnaG                                            | DNA primase n=10 Tax=Streptococcus agalactiae<br>ReplID=E7S3E5_STR AG                                                                             | 0         | uniref90         |
| STRA101363 |                                                 | ABC superfamily ATP binding cassette transporter, ABC protein n=10<br>Tax=Streptococcus ReplID=E0PKX3_STR GY                                      | 1.00E-127 | uniref90         |
| STRA101377 | vacB                                            | Ribonuclease R n=10 Tax=Streptococcus agalactiae<br>ReplID=E7S389_STR AG                                                                          | 0         | uniref90         |
| STRA101382 | COAE                                            | Dephospho-CoA kinase n=9 Tax=Streptococcus agalactiae<br>ReplID=COAE_STR A1                                                                       | 1.00E-109 | uniref90         |
| STRA101383 | FPG                                             | Formamidopyrimidine-DNA glycosylase n=9 Tax=Streptococcus<br>agalactiae ReplID=FPG_STR A1                                                         | 1.00E-158 | uniref90         |
| STRA101391 |                                                 | PRK00016 putative metalloprotease [Streptococcus agalactiae<br>NEM316]                                                                            | 4.00E-89  | NCBI<br>clusters |
| STRA101397 |                                                 | PRK13672 multi-domain protein                                                                                                                     | 7.00E-28  | CDD              |
| STRA101399 |                                                 | S1 RNA binding domain protein n=9 Tax=Streptococcus agalactiae<br>ReplID=E7S364_STR AG                                                            | 1.00E-156 | uniref90         |
| STRA101400 | frr                                             | Ribosome-recycling factor n=11 Tax=Streptococcus<br>ReplID=RRF_STR A1                                                                             | 1.00E-101 | uniref90         |
| STRA101408 | rplK                                            | 50S ribosomal protein L11 n=262 Tax=Streptococcus<br>ReplID=RL11_STR P1                                                                           | 4.00E-72  | uniref90         |
| STRA101415 | similar to DNA<br>translocase                   | DNA translocase FtsK n=11 Tax=Streptococcus agalactiae<br>ReplID=FTSK_STR A3                                                                      | 0         | uniref90         |
| STRA101421 | pfs                                             | 5'-methylthioadenosine/S-adenosylhomocysteine nucleosidase n=10<br>Tax=Streptococcus agalactiae ReplID=E7S342_STR AG                              | 1.00E-111 | uniref90         |
| STRA101423 |                                                 | ADP-ribose diphosphatase n=10 Tax=Streptococcus agalactiae<br>ReplID=E7S340_STR AG                                                                | 2.00E-84  | uniref90         |
| STRA101424 | GLMU                                            | Bifunctional protein GlmU n=10 Tax=Streptococcus agalactiae<br>ReplID=GLMU_STR A1                                                                 | 0         | uniref90         |
| STRA101438 | metG                                            | Methionine--tRNA ligase n=10 Tax=Streptococcus agalactiae<br>ReplID=E7S324_STR AG                                                                 | 0         | uniref90         |
| STRA101444 |                                                 | ArsC family protein n=11 Tax=Streptococcus agalactiae<br>ReplID=E7S317_STR AG                                                                     | 2.00E-50  | uniref90         |
| STRA101450 |                                                 | Initiation-control protein yabA n=10 Tax=Streptococcus agalactiae<br>ReplID=YABA_STR A1                                                           | 2.00E-47  | uniref90         |
| STRA101468 | rIuB                                            | Pseudouridine synthase n=20 Tax=Streptococcus<br>ReplID=E0PLU3_STR GY                                                                             | 1.00E-124 | uniref90         |
| STRA101469 | segregation<br>and<br>condensation<br>protein B | Segregation and condensation protein B n=9 Tax=Streptococcus<br>agalactiae ReplID=SCP B_STR A1                                                    | 2.00E-97  | uniref90         |

|            |                                                   |                                                                                                                                      |           |          |
|------------|---------------------------------------------------|--------------------------------------------------------------------------------------------------------------------------------------|-----------|----------|
| STRA101470 | segregation and condensation protein A            | Segregation and condensation protein A n=9 Tax=Streptococcus agalactiae RepID=SCPA_STR1                                              | 1.00E-131 | uniref90 |
| STRA101473 |                                                   | Phosphoesterase n=10 Tax=Streptococcus agalactiae RepID=E7S2Y6_STRAG                                                                 | 1.00E-97  | uniref90 |
| STRA101475 | MURI                                              | Glutamate racemase n=9 Tax=Streptococcus agalactiae RepID=MURI_STR3                                                                  | 1.00E-152 | uniref90 |
| STRA101476 |                                                   | UPF0154 protein SAG1601 n=8 Tax=Streptococcus agalactiae RepID=Y1601_STR5                                                            | 2.00E-37  | uniref90 |
| STRA101479 |                                                   | Membrane protein n=10 Tax=Streptococcus agalactiae RepID=E7S2Y0_STRAG                                                                | 5.00E-96  | uniref90 |
| STRA101490 | MURC                                              | UDP-N-acetylmuramate--L-alanine ligase n=12 Tax=Streptococcus agalactiae RepID=MURC_STR1                                             | 0         | uniref90 |
| STRA101495 | dnal                                              | Primosomal protein Dnal n=10 Tax=Streptococcus agalactiae RepID=E7S2W5_STRAG                                                         | 1.00E-176 | uniref90 |
| STRA101500 |                                                   | Nucleic acid-binding protein n=5 Tax=Streptococcus agalactiae RepID=E7S2W0_STRAG                                                     | 1.00E-71  | uniref90 |
| STRA101503 |                                                   | Ribosomal RNA small subunit methyltransferase G n=10 Tax=Streptococcus agalactiae RepID=RSMG_STR1                                    | 1.00E-120 | uniref90 |
| STRA101505 |                                                   | Trk family potassium (K+) transporter, NAD+ binding protein n=9 Tax=Streptococcus agalactiae RepID=E7S2V5_STRAG                      | 1.00E-125 | uniref90 |
| STRA101511 | ABC transporter, permease protein                 | D-methionine ABC superfamily ATP binding cassette transporter, membrane protein n=10 Tax=Streptococcus agalactiae RepID=E7S2U8_STRAG | 1.00E-81  | uniref90 |
| STRA101512 | ABC transporter, ATP-binding protein              | Methionine import ATP-binding protein MetN n=10 Tax=Streptococcus agalactiae RepID=METN_STR1                                         | 0         | uniref90 |
| STRA101530 |                                                   | lojap protein family protein n=10 Tax=Streptococcus agalactiae RepID=E7S2S9_STRAG                                                    | 5.00E-61  | uniref90 |
| STRA101534 | putative RNA-binding protein containing KH domain | RNA-binding protein n=12 Tax=Streptococcus RepID=E7S2S5_STRAG                                                                        | 5.00E-53  | uniref90 |
| STRA101538 | gatB                                              | Aspartyl/glutamyl-tRNA(Asn/Gln) amidotransferase subunit B n=17 Tax=Streptococcus RepID=GATB_STR1                                    | 0         | uniref90 |
| STRA101539 | gatA                                              | Glutamyl-tRNA(Gln) amidotransferase subunit A n=10 Tax=Streptococcus agalactiae RepID=GATA_STR1                                      | 0         | uniref90 |
| STRA101548 |                                                   | Universal stress family protein n=9 Tax=Streptococcus agalactiae RepID=E7S2R0_STRAG                                                  | 2.00E-81  | uniref90 |
| STRA101551 | aroE                                              | Shikimate dehydrogenase n=9 Tax=Streptococcus agalactiae RepID=E7S2Q7_STRAG                                                          | 1.00E-161 | uniref90 |
| STRA101553 | recG                                              | ATP-dependent DNA helicase n=23 Tax=Streptococcus RepID=A2RCU6_STRPG                                                                 | 0         | uniref90 |
| STRA101555 | ALR                                               | Alanine racemase n=9 Tax=Streptococcus agalactiae RepID=ALR_STR1                                                                     | 0         | uniref90 |
| STRA101556 | ACPS                                              | Holo-[acyl-carrier-protein] synthase n=10 Tax=Streptococcus agalactiae RepID=ACPS_STR1                                               | 2.00E-63  | uniref90 |
| STRA101561 |                                                   | PTS family beta-glucosides porter, IIABC component n=10 Tax=Streptococcus agalactiae RepID=E7S2P7_STRAG                              | 0         | uniref90 |
| STRA101562 | scrB                                              | Sucrose-6-phosphate hydrolase n=10 Tax=Streptococcus agalactiae RepID=E7S2P6_STRAG                                                   | 0         | uniref90 |
| STRA101565 |                                                   | [S] COG1302 Uncharacterized protein conserved in bacteria                                                                            | 8.00E-54  | cog      |
| STRA101576 |                                                   | Putative membrane protein n=1 Tax=Streptococcus uberis 0140J RepID=B9DVK1_STRU0                                                      | 5.00E-74  | uniref90 |
| STRA101579 | ssb-3                                             | Single-stranded DNA-binding protein 1 n=9 Tax=Streptococcus agalactiae RepID=SSB1_STR3                                               | 3.00E-73  | uniref90 |
| STRA101580 | rpsF                                              | 30S ribosomal protein S6 n=3 Tax=Streptococcus RepID=E8KT13_STRVE                                                                    | 2.00E-44  | uniref90 |
| STRA101581 | mutY                                              | A/G-specific adenine glycosylase n=26 Tax=Streptococcus RepID=B5XI42_STRPZ                                                           | 0         | uniref90 |
| STRA101585 |                                                   | CvpA family protein n=10 Tax=Streptococcus agalactiae RepID=E7S2M1_STRAG                                                             | 4.00E-80  | uniref90 |
| STRA101587 | RNH3                                              | Ribonuclease HIII n=10 Tax=Streptococcus agalactiae RepID=RNH3_STR1                                                                  | 1.00E-170 | uniref90 |
| STRA101588 |                                                   | Signal peptidase I n=10 Tax=Streptococcus agalactiae RepID=E7S2L8_STRAG                                                              | 2.00E-99  | uniref90 |

|            |       |                                                                                                                            |           |                  |
|------------|-------|----------------------------------------------------------------------------------------------------------------------------|-----------|------------------|
| STRA101591 | DPO4  | DNA polymerase IV n=10 Tax=Streptococcus agalactiae<br>ReplID=DPO4_STR1                                                    | 0         | uniref90         |
| STRA101633 |       | Probable tRNA threonylcarbamoyladenine biosynthesis protein<br>Gcp n=9 Tax=Streptococcus agalactiae ReplID=GCP_STR1        | 1.00E-180 | uniref90         |
| STRA101636 |       | PRK13667 multi-domain protein                                                                                              | 3.00E-28  | CDD              |
| STRA101639 | glnA  | PRK09469 glutamine synthetase [Cronobacter turicensis z3032]                                                               | 7.00E-77  | NCBI<br>clusters |
| STRA101642 | PGK   | Phosphoglycerate kinase n=265 Tax=Streptococcus<br>ReplID=PGK_STRGC                                                        | 0         | uniref90         |
| STRA101645 | fusA  | Elongation factor G n=265 Tax=Streptococcus ReplID=EFG_STRP2                                                               | 0         | uniref90         |
| STRA101647 | rpsL  | 30S ribosomal protein S12 n=71 Tax=Streptococcus<br>ReplID=RS12_STRP1                                                      | 8.00E-71  | uniref90         |
| STRA101650 |       | RmuC domain-containing protein n=10 Tax=Streptococcus agalactiae<br>ReplID=F8Y2U9_STRAG                                    | 0         | uniref90         |
| STRA101664 | DLTC  | D-alanine--poly(phosphoribitol) ligase subunit 2 n=10<br>Tax=Streptococcus agalactiae ReplID=DLTC_STR1                     | 4.00E-37  | uniref90         |
| STRA101699 |       | tRNA-dihydrouridine synthase n=10 Tax=Streptococcus agalactiae<br>ReplID=E7S2B5_STRAG                                      | 0         | uniref90         |
| STRA101703 | ctsR  | Transcriptional regulator CtsR n=10 Tax=Streptococcus agalactiae<br>ReplID=E7S2B1_STRAG                                    | 4.00E-83  | uniref90         |
| STRA101706 | rpsB  | 30S ribosomal protein S2 n=132 Tax=Streptococcus<br>ReplID=RS2_STRSV                                                       | 1.00E-105 | uniref90         |
| STRA101712 | pepO  | Peptidase family M13 n=11 Tax=Streptococcus<br>ReplID=G5KGT4_9STRE                                                         | 0         | uniref90         |
| STRA101725 | cdsA  | Phosphatidate cytidyltransferase n=10 Tax=Streptococcus<br>agalactiae ReplID=E7S224_STRAG                                  | 1.00E-143 | uniref90         |
| STRA101752 |       | GTP diphosphokinase n=10 Tax=Streptococcus agalactiae<br>ReplID=E7S1W1_STRAG                                               | 0         | uniref90         |
| STRA101780 |       | RsmE family RNA methyltransferase n=11 Tax=Streptococcus<br>agalactiae ReplID=E7S1T2_STRAG                                 | 1.00E-126 | uniref90         |
| STRA101845 | nusG  | Transcription antitermination protein nusG n=66 Tax=Streptococcus<br>ReplID=NUSG_STRP1                                     | 7.00E-96  | uniref90         |
| STRA101850 | pbp2A | Penicillin-binding protein 2A n=19 Tax=Streptococcus agalactiae<br>ReplID=B2NHG4_STRAG                                     | 0         | uniref90         |
| STRA101851 |       | Pseudouridine synthase n=9 Tax=Streptococcus agalactiae<br>ReplID=Q3D7C8_STRAG                                             | 1.00E-173 | uniref90         |
| STRA101867 |       | GNAT family acetyltransferase n=9 Tax=Streptococcus agalactiae<br>ReplID=E7S1P1_STRAG                                      | 9.00E-84  | uniref90         |
| STRA101870 | nrdD  | Anaerobic ribonucleoside-triphosphate reductase large subunit n=9<br>Tax=Streptococcus agalactiae ReplID=E7S1P5_STRAG      | 0         | uniref90         |
| STRA101875 |       | [S] COG4472 Uncharacterized protein conserved in bacteria                                                                  | 2.00E-41  | cog              |
| STRA101876 | spxA  | Regulatory protein Spx n=10 Tax=Streptococcus<br>ReplID=B9DW64_STRU0                                                       | 2.00E-63  | uniref90         |
| STRA101877 | recA  | Protein RecA n=2 Tax=Streptococcus agalactiae ReplID=RECA_STRAG                                                            | 0         | uniref90         |
| STRA101880 | RUVA  | Holliday junction ATP-dependent DNA helicase RuvA n=10<br>Tax=Streptococcus agalactiae ReplID=RUVA_STR1                    | 1.00E-101 | uniref90         |
| STRA101885 | hexA  | DNA mismatch repair protein MutS n=10 Tax=Streptococcus<br>agalactiae ReplID=MUTS_STR1                                     | 0         | uniref90         |
| STRA101890 |       | [S] COG1284 Uncharacterized conserved protein                                                                              | 1.00E-118 | cog              |
| STRA101919 |       | TetR family transcriptional regulator n=9 Tax=Streptococcus<br>agalactiae ReplID=E7S1D2_STRAG                              | 1.00E-100 | uniref90         |
| STRA101943 | rplI  | 50S ribosomal protein L9 n=11 Tax=Streptococcus agalactiae<br>ReplID=RL9_STR1                                              | 1.00E-59  | uniref90         |
| STRA101947 | trmU  | tRNA-specific 2-thiouridylase mnmA n=10 Tax=Streptococcus<br>agalactiae ReplID=MNMA_STR1                                   | 0         | uniref90         |
| STRA101955 | pgsA  | CDP-diaclyglycerol-glycerol-3-phosphate 3-phosphatidyltransferase<br>n=10 Tax=Streptococcus agalactiae ReplID=E7S194_STRAG | 7.00E-97  | uniref90         |
| STRA101956 |       | M16C subfamily protease n=11 Tax=Streptococcus agalactiae<br>ReplID=E7S193_STRAG                                           | 0         | uniref90         |
| STRA101957 |       | peptidase M16 inactive domain protein                                                                                      | 0         | kegg             |
| STRA101977 | htrA  | Serine protease HtrA n=10 Tax=Streptococcus agalactiae<br>ReplID=E7S172_STRAG                                              | 0         | uniref90         |

**Table T6.** Annotation of *Streptococcus pyogenes*-specific or expanded protein clusters identified when compared to the *S. equi* proteomes from the OMA December2012 release. For each cluster, the protein from *S. pyogenes* M1 GAS was used as the group's representative for querying NCBI's nr protein database and annotated by taking the first hit produced by BLASTP. The first 42 proteins are found in all 11 *S. pyogenes* proteomes. An additional 13 proteins (43-55) were found when their presence was requested in only 90% of the *S. pyogenes* strains. The final three protein families have been selectively expanded in the *S. pyogenes* lineage.

| Annot. No. | OMA ID     | gene | Subject title                                                                                  | E-score   | Source DB |
|------------|------------|------|------------------------------------------------------------------------------------------------|-----------|-----------|
| 1          | STRP100064 |      | Unassigned protein                                                                             |           |           |
| 2          | STRP100068 |      | putative histidine triad (HIT) protein                                                         | 2.00E-69  | kegg      |
| 3          | STRP100083 |      | Unassigned protein                                                                             |           |           |
| 4          | STRP100100 | atoE | Short-chain fatty acids transporter<br>n=16 Tax=Streptococcus pyogenes<br>RepID=Q1J8T9_STRPF   | 0         | uniref90  |
| 5          | STRP100101 |      | Acetyl-CoA acetyltransferase 1 n=15<br>Tax=Streptococcus pyogenes<br>RepID=A2RC85_STRPG        | 0         | uniref90  |
| 6          | STRP100102 |      | Acetate CoA-transferase alpha<br>subunit n=14 Tax=Streptococcus<br>pyogenes RepID=Q1J8T6_STRPF | 1.00E-116 | uniref90  |
| 7          | STRP100103 |      | Acetate CoA-transferase beta subunit<br>n=14 Tax=Streptococcus pyogenes<br>RepID=Q5XE60_STRP6  | 1.00E-118 | uniref90  |
| 8          | STRP100108 |      | V-type sodium ATP synthase subunit I<br>n=15 Tax=Streptococcus pyogenes<br>RepID=Q491H3_STRP1  | 0         | uniref90  |
| 9          | STRP100109 | ntpK | V-type sodium ATP synthase subunit<br>K n=13 Tax=Streptococcus pyogenes<br>RepID=Q1J8S9_STRPF  | 9.00E-74  | uniref90  |
| 10         | STRP100110 | ntpE | V-type ATP synthase, subunit E n=13<br>Tax=Streptococcus pyogenes<br>RepID=E0PYB4_STRPY        | 4.00E-97  | uniref90  |
| 11         | STRP100111 | ntpC | V-type sodium ATP synthase subunit<br>C n=14 Tax=Streptococcus pyogenes<br>RepID=A2RC95_STRPG  | 0         | uniref90  |
| 12         | STRP100112 | VATA | V-type ATP synthase alpha chain n=15<br>Tax=Streptococcus pyogenes                             | 0         | uniref90  |



|    |            |      |                                                                                                                      |           |          |
|----|------------|------|----------------------------------------------------------------------------------------------------------------------|-----------|----------|
|    |            |      | ReplID=VATA_STRP1                                                                                                    |           |          |
| 13 | STRP100113 |      | V-type ATP synthase beta chain n=50<br>Tax=Streptococcus<br>ReplID=VATB_STRP1                                        | 0         | uniref90 |
| 14 | STRP100114 | ntpD | V-type ATP synthase subunit D n=15<br>Tax=Streptococcus pyogenes<br>ReplID=VATD_STRPZ                                | 1.00E-104 | uniref90 |
| 15 | STRP100125 |      | Unassigned protein                                                                                                   |           |          |
| 16 | STRP100148 |      | Membrane protein n=130<br>Tax=Streptococcus<br>ReplID=B2DQJ9_STRPN                                                   | 0         | uniref90 |
| 17 | STRP100149 | nadC | Nicotinate-nucleotide<br>diphosphorylase n=131<br>Tax=Streptococcus<br>ReplID=E0PVG0_STRPY                           | 1.00E-155 | uniref90 |
| 18 | STRP100343 |      | Unassigned protein                                                                                                   | 8.00E-41  | uniref90 |
| 19 | STRP100348 |      | Unassigned protein                                                                                                   | 1.00E-173 | uniref90 |
| 20 | STRP100349 |      | Unassigned protein                                                                                                   | 5.00E-60  | uniref90 |
| 21 | STRP100350 |      | Unassigned protein                                                                                                   |           |          |
| 22 | STRP100360 |      | Glutaminy-peptide cyclotransferase<br>n=16 Tax=Streptococcus pyogenes<br>ReplID=Q1JI41_STRPD                         | 1.00E-137 | uniref90 |
| 23 | STRP100362 |      | Permease n=14 Tax=Streptococcus<br>pyogenes ReplID=E0PXE1_STRPY                                                      | 1.00E-144 | uniref90 |
| 24 | STRP100363 |      | Permease n=15 Tax=Streptococcus<br>pyogenes ReplID=E0PXE0_STRPY                                                      | 8.00E-75  | uniref90 |
| 25 | STRP100384 |      | Shikimate dehydrogenase n=15<br>Tax=Streptococcus pyogenes<br>ReplID=E0PXB1_STRPY                                    | 1.00E-178 | uniref90 |
| 26 | STRP100385 |      | Xylose isomerase-like TIM barrel<br>family protein n=16<br>Tax=Streptococcus pyogenes<br>ReplID=G4R3F0_STRPY         | 1.00E-127 | uniref90 |
| 27 | STRP100386 |      | Putative F420-0:gamma-glutamyl<br>ligase n=1 Tax=Streptococcus<br>porcinus str. Jelinkova 176<br>ReplID=F3L7A2_STRPO | 3.00E-91  | uniref90 |

|    |            |       |                                                                                                   |           |          |
|----|------------|-------|---------------------------------------------------------------------------------------------------|-----------|----------|
| 28 | STRP100387 |       | MviM domain containing protein                                                                    | 3.00E-05  | CDD      |
| 29 | STRP100388 |       | Methionine adenosyltransferase n=2<br>Tax=Streptococcus pseudoporcinus<br>ReplID=E4L1P8_9STRE     | 0         | uniref90 |
| 30 | STRP100389 |       | HprK_C domain containing protein                                                                  | 3.00E-06  | CDD      |
| 31 | STRP100390 |       | Glycosyl transferase 2 family protein<br>n=13 Tax=Streptococcus pyogenes<br>ReplID=G4R3F5_STRPY   | 1.00E-177 | uniref90 |
| 32 | STRP100396 |       | Unassigned protein                                                                                |           |          |
| 33 | STRP100397 |       | Unassigned protein                                                                                | 0         | uniref90 |
| 34 | STRP100399 |       | Plasmid stabilization system toxin<br>protein n=17 Tax=Streptococcus<br>ReplID=Q1JCY0_STRPB       | 5.00E-51  | uniref90 |
| 35 | STRP100446 |       | Unassigned protein                                                                                |           |          |
| 36 | STRP100565 |       | DUF1722 multi-domain protein                                                                      | 7.00E-30  | CDD      |
| 37 | STRP100627 | czcD  | Cation efflux family protein n=13<br>Tax=Streptococcus pyogenes<br>ReplID=A2RF51_STRPG            | 1.00E-145 | uniref90 |
| 38 | STRP100707 |       | Phage protein n=5 Tax=Streptococcus<br>ReplID=E7S238_STRAG                                        | 8.00E-12  | uniref90 |
| 39 | STRP100775 | hylA  | Hyaluronate lyase n=31 Tax=cellular<br>organisms ReplID=Q1J6X4_STRPF                              | 0         | uniref90 |
| 40 | STRP100836 |       | Sensor histidine kinase n=17<br>Tax=Streptococcus<br>ReplID=E0PW29_STRPY                          | 0         | uniref90 |
| 41 | STRP100974 | cfa   | CAMP factor n=16 Tax=Streptococcus<br>pyogenes ReplID=A2RE73_STRPG                                | 1.00E-145 | uniref90 |
| 42 | STRP101070 |       | Unassigned protein                                                                                |           |          |
| 43 | STRP101307 | LACA1 | Galactose-6-phosphate isomerase<br>subunit lacA 1 n=20<br>Tax=Streptococcus<br>ReplID=LACA1_STRP3 | 5.00E-75  | uniref90 |
| 44 | STRP101359 |       | Unassigned protein                                                                                | 4.00E-31  | uniref90 |
| 45 | STRP101369 |       | ABC transporter permease protein<br>n=15 Tax=Streptococcus pyogenes<br>ReplID=Q1JA65_STRPB        | 1.00E-111 | uniref90 |

|    |            |       |                                                                                                                       |           |          |
|----|------------|-------|-----------------------------------------------------------------------------------------------------------------------|-----------|----------|
| 46 | STRP101408 |       | Phosphatidylglycerophosphatase B<br>n=24 Tax=Streptococcus<br>RepID=Q1J517_STRPF                                      | 1.00E-77  | uniref90 |
| 47 | STRP101432 | nupC  | Nucleoside permease nupC n=24<br>Tax=Streptococcus<br>RepID=Q1J4Z2_STRPF                                              | 0         | uniref90 |
| 48 | STRP101434 |       | GntR family regulatory protein n=14<br>Tax=Streptococcus pyogenes<br>RepID=A2RCN1_STRPG                               | 1.00E-137 | uniref90 |
| 49 | STRP101461 |       | Glycerate kinase n=16<br>Tax=Streptococcus pyogenes<br>RepID=E0PU32_STRPY                                             | 0         | uniref90 |
| 50 | STRP101463 | hsdS  | Type I restriction-modification system<br>specificity subunit n=3<br>Tax=Streptococcus pyogenes<br>RepID=Q1J9W3_STRPB | 0         | uniref90 |
| 51 | STRP101469 | salA  | SalA2 lantibiotic salivaricin A2 n=5<br>Tax=Streptococcus salivarius<br>RepID=G2GW05_STRSL                            | 5.00E-19  | uniref90 |
| 52 | STRP101499 |       | Unassigned protein                                                                                                    | 6.00E-18  | uniref90 |
| 53 | STRP101500 |       | Probable transcriptional regulator<br>n=12 Tax=Streptococcus pyogenes<br>RepID=E0PTY5_STRPY                           | 2.00E-45  | uniref90 |
| 54 | STRP101555 | PRSA2 | Foldase protein prsA 2 n=14<br>Tax=Streptococcus pyogenes<br>RepID=PRSA2_STRP6                                        | 1.00E-133 | uniref90 |
| 55 | STRP101556 | SPEB  | Streptopain n=23 Tax=Streptococcus<br>pyogenes RepID=SPEB_STRP3                                                       | 0         | uniref90 |
| 56 | STRP101557 |       | Unassigned protein                                                                                                    | 3.00E-24  | uniref90 |
| 57 | STRP101559 | ropB  | Transcriptional regulator n=49<br>Tax=Streptococcus pyogenes<br>RepID=Q1J9I9_STRPB                                    | 1.00E-159 | uniref90 |
| 58 | STRP101640 | uviB  | Bacteriocin UviB n=24<br>Tax=Streptococcus<br>RepID=E0PTK3_STRPY                                                      | 1.00E-51  | uniref90 |

**Table T7.** Estimated core-genome sizes and memory requirements of algorithm BDBH in default mode and in minimum BLAST mode (-b parameter), enforcing 75% alignment coverage.

| test set              | number of sequences | BDBH          |         | BDBHmin       |         |
|-----------------------|---------------------|---------------|---------|---------------|---------|
|                       |                     | core clusters | RAM(MB) | core clusters | RAM(MB) |
| Escherichia coli101   | 497131              | 891           | N.D.    | 890           | 4207    |
| Escherichia coli20    | 93612               | 1935          | 3429    | 1934          | 1058    |
| Vibrionales38         | 165536              | 559           | 7699    | 559           | 1450    |
| Gammaproteobacteria13 | 42011               | 250           | 636     | 249           | 369     |
